# Supplementary material for: Redefining the Robeson upper bounds for CO2/CH4 and CO2/N2 separations using a series of ultrapermeable benzotriptycene-based polymers of intrinsic microporosity
Source: Royal Society of Chemistry journal article supplement (doi:10.1039/c9ee01384a), 2019-01-01
Supplement: c9ee01384a1.pdf [file c9ee01384a1.pdf]

# Redefining the Robeson upper bounds for CO<sub>2</sub>/CH<sub>4</sub> and CO<sub>2</sub>/N<sub>2</sub> separations using a series of ultrapermeable benzotriptycene-based Polymers of Intrinsic Microporosity.

Bibiana Comesaña-Gándara<sup>a†</sup>, Jie Chen<sup>a†</sup>, C. Grazia Bezzu<sup>a</sup>, Mariolino Carta<sup>b</sup>, Ian Rose<sup>a</sup>, Maria-Chiara Ferrari<sup>c</sup>, Elisa Esposito<sup>d</sup>, Alessio Fuoco<sup>d</sup>, Johannes C. Jansen<sup>d\*</sup> and Neil B. McKeown<sup>a\*</sup>

<sup>a</sup>*EaStCHEM, School of Chemistry, University of Edinburgh, David Brewster Road, Edinburgh, EH9 3FJ, (UK). E-mail: neil.mckeown@ed.ac.uk.*

<sup>b</sup>*Department of Chemistry, Swansea University, College of Science, Grove Building, Singleton Park, Swansea, SA2 8PP, (UK).*

<sup>c</sup>*Institute for Materials and Processes, School of Engineering, The University of Edinburgh, Mayfield Road, Edinburgh EH9 3JL, (UK).*

<sup>d</sup>*Institute on Membrane Technology, ITM-CNR, Via P. Bucci 17/C, 87036 Rende (CS), (Italy).*

## Table of Contents

**Table S1.** The gas permeability data for polymers that were used to defined the 2008 Robeson upper bounds for CO<sub>2</sub>/N<sub>2</sub> and CO<sub>2</sub>/CH<sub>4</sub> and those reported subsequently near or above these upper bounds.

## S1. Materials and Methods

### S1.1. General methods and equipment.

### S1.2. Monomer synthesis.

2a-b, 3a-b, 4a-f, 5a-f, 6a-f, 1a-f (see Fig. 1)

### S1.3. Polymer synthesis.

PIM-TMN-Trip; PIM-HMI-Trip; PIM-DM-BTrip; PIM-TFM-BTrip and  
PIM-DTFM-BTrip (see Fig. 1)

## S2. Pure gas permeation measurements

**Fig. S1.** Nitrogen adsorption isotherms for PIMs.

**Fig. S2.** Carbon dioxide adsorption isotherms for PIMs.

**Fig. S3.** Cumulative pore volume for PIMs.

**Fig. S4.** Photographs of solvent cast films.

**Fig. S5.** Ageing trends for PTMSP, PIM-1, PIM-BTrip and PIM-TMN-Trip.

**Fig. S6.** Robeson plots showing error bars for values of gas permeability.

**Fig. S7.** Correlation between  $d_x^2$  and  $D_x$  for aged films of PIM-BTrip.

**Fig. S8.** Correlation between  $d_x^2$  and  $D_x$  showing error bars for  $D_x$ .

**Table S2.** Ideal gas diffusion coefficients of PIMs.

**Table S3.** Ideal gas solubility coefficients of PIMs.

**Table S1.** The gas permeability data for polymers that were used to defined the 2008 Robeson upper bounds<sup>1</sup> for CO<sub>2</sub>/N<sub>2</sub> and CO<sub>2</sub>/CH<sub>4</sub> (PTMSP, PTMGP, PIM-1 and PIM-7) and those reported subsequently with data near or above these upper bounds.

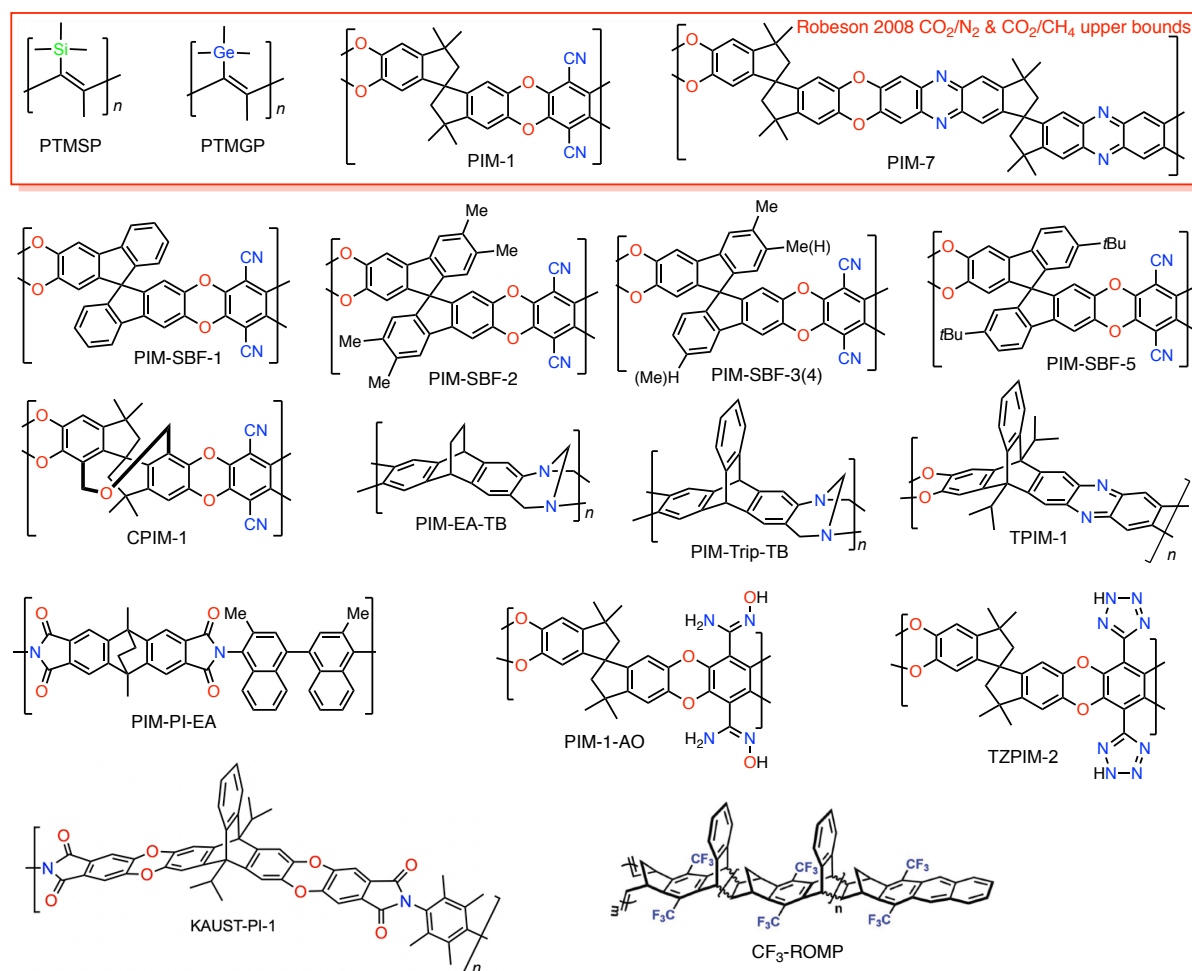

| Polymer   | <sup>a</sup> Film history | $PCO_2$<br>(Barrer) | $PCO_2/PN_2$ | $PCO_2/PCH_4$ | Ref.         |
|-----------|---------------------------|---------------------|--------------|---------------|--------------|
| PTMSP     | Fresh                     | 29000               | 10.7         | 4.5           | <sup>2</sup> |
| PTMGP     | Fresh                     | 14000               | 14.0         | 4.4           | <sup>2</sup> |
| PIM-1     | - <sup>b</sup>            | 2300                | 25.0         | 18.0          | <sup>3</sup> |
|           | MeOH                      | 13600               | 16.6         | 10.0          | <sup>4</sup> |
| PIM-7     | - <sup>b</sup>            | 1100                | 26.2         | 17.7          | <sup>3</sup> |
|           | MeOH                      | 13900               | 17.7         | 12.6          | <sup>4</sup> |
| PIM-SBF-1 | Aged 2088 d               | 2410                | 27.5         | 23.6          | <sup>5</sup> |
|           | MeOH                      | 22300               | 19.4         | 11.0          | <sup>5</sup> |
| PIM-SBF-2 | Aged 1295 d               | 3870                | 23.3         | 21.0          | <sup>5</sup> |
|           | MeOH                      | 10900               | 23.5         | 12.4          | <sup>5</sup> |
| PIM-SBF-3 | Aged 1295                 | 4850                | 22.1         | 19.6          | <sup>5</sup> |

|                       |               |       |      |      |               |
|-----------------------|---------------|-------|------|------|---------------|
| PIM-SBF-4             | MeOH          | 10600 | 22.4 | 12.7 | <sup>5</sup>  |
|                       | Aged 1428     | 6410  | 22.4 | 19.4 | <sup>5</sup>  |
| PIM-SBF-5             | MeOH          | 16400 | 15.2 | 6.6  | <sup>5</sup>  |
|                       | Aged 1439     | 10000 | 18.2 | 10.8 | <sup>5</sup>  |
| PIM-EA-TB             | MeOH          | 7696  | 23.0 | 15.8 | <sup>6</sup>  |
| PIM-Trip-TB           | MeOH          | 9709  | 15.4 | 10.7 | <sup>7</sup>  |
|                       | Aged 100 d    | 3951  | 20.9 | 18.1 | <sup>7</sup>  |
| TPIM-1                | Aged 14 d     | 1549  | 28.7 | 31.0 | <sup>8</sup>  |
| KAUST-PI-1            | Aged 14 d     | 2389  | 22.3 | 22.8 | <sup>9</sup>  |
| PIM-1-AO              | Aged 7 d      | 1153  | 35.0 | 34.0 | <sup>10</sup> |
| PIM-TZ                | <sup>-b</sup> | 1000  | 30.0 | 22.0 | <sup>11</sup> |
| PIM-PI-EA             | MeOH          | 7340  | 19.9 | 16.1 | <sup>12</sup> |
|                       | Aged 273 d    | 3230  | 24.6 | 20.7 | <sup>12</sup> |
| CPIM-1                | MeOH          | 18900 | 19.3 | 14.4 | <sup>13</sup> |
| PIM-TMN-Trip          | MeOH          | 33300 | 14.9 | 9.7  | <sup>14</sup> |
|                       | Aged 365 d    | 14100 | 19.3 | 14.9 | <sup>14</sup> |
| CF <sub>3</sub> -ROMP | EtOH          | 21266 | 9.0  | 5.4  | <sup>15</sup> |
|                       | Aged 35 d     | 16148 | 8.8  | 5.5  | <sup>15</sup> |

<sup>a</sup>Film Histories. Methanol (MeOH) or ethanol (EtOH) treated film. Aged for stated number of day (d). <sup>b</sup>Film history not specified.

1. L. M. Robeson, *J. Membr. Sci.*, 2008, **320**, 390-400.
2. T. Mizumoto, T. Masuda and T. Higashimura, *J. Polym. Sci. A: Polym. Chem.*, 1993, **31**, 2555-2561.
3. P. M. Budd, K. J. Msayib, C. E. Tattershall, B. S. Ghanem, K. J. Reynolds, N. B. McKeown and D. Fritsch, *J. Membr. Sci.*, 2005, **251**, 263-269.
4. C. G. Bezzu, M. Carta, A. Tonkins, J. C. Jansen, P. Bernardo, F. Bazzarelli and N. B. McKeown, *Adv. Mater.*, 2012, **24**, 5930-5933.
5. C. G. Bezzu, M. Carta, M. C. Ferrari, J. C. Jansen, M. Monteleone, E. Esposito, A. Fuoco, K. Hart, T. P. Liyana-Arachchi, C. M. Colina and N. B. McKeown, *J. Mater. Chem. A*, 2018, **6**, 10507-10514.
6. M. Carta, R. Malpass-Evans, M. Croad, Y. Rogan, J. C. Jansen, P. Bernardo, F. Bazzarelli and N. B. McKeown, *Science*, 2013, **339**, 303-307.
7. M. Carta, M. Croad, R. Malpass-Evans, J. C. Jansen, P. Bernardo, G. Clarizia, K. Friess, M. Lanc and N. B. McKeown, *Adv. Mater.*, 2014, **26**, 3526-3531.
8. B. S. Ghanem, R. Swaidan, X. H. Ma, E. Litwiller and I. Pinnau, *Adv. Mater.*, 2014, **26**, 6696-6700.
9. B. S. Ghanem, R. Swaidan, E. Litwiller and I. Pinnau, *Adv. Mater.*, 2014, **26**, 3688-3692.
10. R. Swaidan, B. S. Ghanem, E. Litwiller and I. Pinnau, *J. Membr. Sci.*, 2014, **457**, 95-102.
11. N. Du, H. B. Park, G. P. Robertson, M. M. Dal-Cin, T. Visser, L. Scoles and M. D. Guiver, *Nat. Mater.*, 2011, **10**, 372-375.
12. Y. Rogan, L. Starannikova, V. Ryzhikh, Y. Yampolskii, P. Bernardo, F. Bazzarelli, J. C. Jansen and N. B. McKeown, *Polym. Chem.*, 2013, **4**, 3813-3820.

13. J. Zhang, H. Kang, J. Martin, S. Zhang, S. Thomas, T. C. Merkel and J. Jin, *Chem. Commun.*, 2016, **52**, 6553-6556.
14. I. Rose, C. G. Bezzu, M. Carta, B. Comesana-Gandara, E. Lasseguette, M. C. Ferrari, P. Bernardo, G. Clarizia, A. Fuoco, J. C. Jansen, K. E. Hart, T. P. Liyana-Arachchi, C. M. Colina and N. B. McKeown, *Nat. Mater.*, 2017, **16**, 932-937.
15. Y. He, F. M. Benedetti, S. Lin, C. Liu, Y. Zhao, H.-Z. Ye, T. Van Voorhis, M. G. De Angelis, T. M. Swager and Z. P. Smith, *Adv. Mater.*, 2019, **30**, DOI:10.1002/adma.201807871.

## S.1 Materials and Methods

### S1.1 General methods and equipment.

Commercially available reagents were used without further purification. Anhydrous dichloromethane and tetrahydrofuran were obtained from a Solvent Purification System. Anhydrous *N,N*-dimethylformamide was bought from Sigma Aldrich. All reactions using air/moisture sensitive reagents were performed in oven-dried or flame-dried apparatus, under a nitrogen atmosphere. TLC analysis refers to analytical thin layer chromatography, using aluminium-backed plates coated with Merck Kieselgel 60 GF<sub>254</sub>. Flash chromatography was performed on silica gel 60 Å (35-70 micron) chromatography grade (Fisher Scientific). Melting points were recorded using a Stuart Digital Melting Point Apparatus and are uncorrected. <sup>1</sup>H NMR spectra were recorded in the solvent stated using an Avance Bruker DPX 400 (400 MHz) or DPX 500 (500 MHz) instruments, with <sup>13</sup>C NMR spectra recorded at 100 MHz or 125 MHz respectively. The solid state <sup>13</sup>C NMR were obtained using a Bruker Ultrashield™ 300 WB spectrometer operating at 76 MHz. Low-resolution mass spectrometric data were determined using a Fisons VG Platform II quadrupole instrument using electron impact ionization (EI) unless otherwise stated. High-resolution mass spectrometric data were obtained in electron impact ionization (EI) mode unless otherwise reported, on a Waters Q-TOF micromass spectrometer. The TGA was performed using the device Thermal Analysis SDT Q600 at a heating rate of 10 °C/min from room temperature to 1000 °C. Low-temperature (77 K) N<sub>2</sub> and CO<sub>2</sub> (273 K) adsorption/desorption isotherms were obtained using a Quantachrome Autosorb iQ surface area analyser. The powder samples were degassed for 800 mins at 125 °C under high vacuum prior to analysis. The powder samples were degassed for 600 min at 120 °C before the experiment. Gel permeation chromatography (GPC) analyses were performed on chloroform solutions (1 mg ml<sup>-1</sup>) using a GPC MAX 1000 system equipped with two Viscotek CLM3012 LT 5000L columns and a RI(VE3580) detector, operating at a flow rate of 1 ml min<sup>-1</sup>. Calibration was achieved using Viscotek polystyrene standards (*M<sub>w</sub>* 1000 – 1,000,000 g mol<sup>-1</sup>). Inherent viscosity measurements were made with an Ubbelohde capillary (Schott, Germany), maintained at 20 °C using quinoline solutions (~3.0 g cm<sup>-3</sup>).

### S1.2 Monomer and polymer synthesis.

#### *1,2,3,4-Tetrahydro-1,1,4,4-tetramethylnaphthalene (2a)*

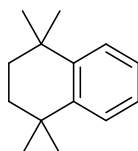

The compound 1,2,3,4-tetrahydro-1,1,4,4-tetramethylnaphthalene (**2a**) was prepared according to the procedure reported by H. Toyama *et al.*<sup>16</sup> A solution of 2,5-dichloro-2,5-dimethylhexane (20.0 g, 109 mmol) in anhydrous benzene (250 mL, 2.80 mmol) was heated to 50 °C. To this, AlCl<sub>3</sub> (5.84 g, 44.0 mmol) was added portion wise over 30 min, which was then left at 50 °C for 24 h. The resulting solution

was cooled to room temperature, poured into dilute hydrochloric acid and extracted with DCM (3 x 100 mL). The organic layer was washed with water and dilute sodium carbonate solution before being dried over MgSO<sub>4</sub>. The solvent was removed under vacuum and the resulting orange oil was purified by vacuum distillation to yield 1,2,3,4-tetrahydro-1,1,4,4-tetramethylnaphthalene (**2a**) (14.5 g, 77.0 mmol, 71 %) as a colourless oil.  $\nu_{\max}$  (cm<sup>-1</sup>): 3647, 2959, 2922, 2860, 1487, 1456, 1439, 1362, 1040, 754; <sup>1</sup>H NMR (500 MHz, CDCl<sub>3</sub>):  $\delta$  (ppm) 7.33 (dd, 2H, *J* = 6.0, 3.4 Hz), 7.16 (dd, 2H, *J* = 5.9, 3.4 Hz), 1.71 (s, 4H), 1.31 (s, 12H); <sup>13</sup>C NMR (126 MHz, CDCl<sub>3</sub>):  $\delta$  (ppm) 144.8, 126.5, 125.5, 35.1, 34.2, 31.9; LRMS (EI, m/z): [M<sup>+</sup>] calcd.: 188.16 found: 188.1.

### **2,3-Dihydro-1,1,2,2,3,3-hexamethyl-1H-indene (2b)**

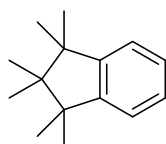

The compound 2,3-dihydro-1,1,2,2,3,3-hexamethyl-1H-indene (**2b**) was synthesised according to the procedure reported by Baran *et al.*<sup>17</sup> (2-chloropropan-2-yl)benzene (17.5 g, 114 mmol) and 2,3-dimethyl-2-butene (23.9 g, 284 mmol) were dissolved in anhydrous DCM (100 mL) and cooled to -78 °C. TiCl<sub>4</sub> (4.31 g, 22.7 mmol) was added dropwise and left at -78 °C for 1 h. The resulting solution was allowed to warm to room temperature, poured into water:HCl (100 mL:50 mL) solution and extracted with DCM, dried over MgSO<sub>4</sub> and removed solvent under vacuum. Product was purified by distillation to yield 2,3-dihydro-1,1,2,2,3,3-hexamethyl-1H-indene (**2b**) (19.0 g, 93.9 mmol, 98 %) as colourless oil.  $\nu_{\max}$  (cm<sup>-1</sup>): 2982, 2955, 2868, 1481, 1450, 1375, 1368, 1111, 1026, 752; <sup>1</sup>H NMR (601 MHz, CDCl<sub>3</sub>):  $\delta$  (ppm) 7.21-7.18 (m, 2H), 7.15-7.11 (m, 2H), 1.21 (s, 12H), 0.89 (s, 6H); <sup>13</sup>C NMR (151 MHz, CDCl<sub>3</sub>):  $\delta$  (ppm) 150.6, 126.7, 122.7, 48.5, 47.8, 27.6, 21.7; LRMS (EI, m/z): [M<sup>+</sup>] calcd.: 202.17, found: 202.1.

### **6,7-Dibromo-1,2,3,4-tetrahydro-1,1,4,4-tetramethylnaphthalene (3a)**

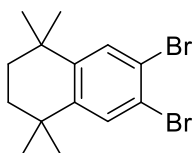

1,2,3,4-Tetrahydro-1,1,4,4-tetramethylnaphthalene (**2a**) (23.8 g, 126 mmol) was dissolved in anhydrous DCM (200 mL) and Fe powder (catalytic amount) was added. To this solution, bromine (60.6 g, 379 mmol) was added dropwise over 1 h and the mixture was left at room temperature for 3 h. The mixture was then poured into water, the organic layer separated and washed with sodium carbonate solution (3 x 100 mL). The organic layer was dried over MgSO<sub>4</sub> and the solvent was removed under reduced

pressure. The crude product was purified by column chromatography (hexane) to yield **3a** (33.0 g, 75 %) as a white crystalline solid. Mp 111 – 112 °C;  $\nu_{max}$  (cm<sup>-1</sup>): 2953, 2936, 2922, 2862, 1460, 1387, 1362, 1348, 1296, 1261, 1211, 1190, 1132, 1105, 1070, 1047, 1020, 887, 860, 839, 756, 685; <sup>1</sup>H NMR (500 MHz, CDCl<sub>3</sub>):  $\delta$  (ppm) 7.50 (s, 2H), 1.66 (s, 4H), 1.25 (s, 12H); <sup>13</sup>C NMR (126 MHz, CDCl<sub>3</sub>):  $\delta$  (ppm) 146.4, 131.8, 121.4, 34.7, 34.3, 31.6; HRMS (EI, m/z): [M<sup>+</sup>] calcd.: 345.9749, found: 345.9751.

#### 5,6-Dibromo-2,3-dihydro-1,1,2,2,3,3-hexamethyl-1H-indene (**3b**)

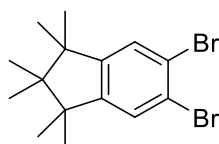

The compound 2,3-dihydro-1,1,2,2,3,3-hexamethyl-1H-indene (**2b**) (5.00 g, 24.7 mmol) was dissolved in anhydrous DCM (60 mL) and Fe powder (catalytic amount) was added. To this solution, bromine (11.8 g, 74.1 mmol) was added dropwise over 1 h and was left at room temperature for 3 h. The resulting reaction mixture was poured into water, organic layer was separated and washed with sodium carbonate solution. The organic layer was dried over MgSO<sub>4</sub> and solvent was removed under vacuum. The crude was purified by column chromatography in hexane and then recrystallized from ethanol to yield 5,6-dibromo-2,3-dihydro-1,1,2,2,3,3-hexamethyl-1H-indene (**3b**) (4.08 g, 46 %) as a white crystalline solid. Mp 118 – 119 °C;  $\nu_{max}$  (cm<sup>-1</sup>): 2982, 2945, 2909, 2868, 1474, 1456, 1449, 1396, 1381, 1368, 1350, 1288, 1161, 1119, 1103, 1067, 872, 854, 756, 673, 584, 538; <sup>1</sup>H NMR (500 MHz, CDCl<sub>3</sub>):  $\delta$  (ppm) 7.34 (s, 2H), 1.18 (s, 12H), 0.86 (s, 6H); <sup>13</sup>C NMR (126 MHz, CDCl<sub>3</sub>):  $\delta$  (ppm) 152.1, 128.1, 122.3, 49.1, 47.8, 27.3, 21.5; HRMS (EI, m/z): [M<sup>+</sup>] calcd.: 357.9926, found: 357.9930.

#### 1,4,5,6,7,8-Hexahydro-5,5,8,8-tetramethyl-1,4-epoxyanthracene (**4a**)

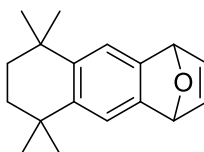

Following the general procedure reported by Luo *et al.*<sup>18</sup>, compound **3a** (13.2 g, 38.0 mmol) and anhydrous furan (25.0 mL, 344 mmol) were dissolved in anhydrous THF (30 mL) and cooled to -78 °C. To this solution, *n*-BuLi (19.8 mL, 50.0 mmol) in anhydrous THF (10 mL) was added dropwise over 0.5 h and the reaction was left to stir at -78 °C for 1.5 h. The resulting solution was allowed to warm to room temperature and water was added (100 mL). The organic layer was extracted with DCM and dried over MgSO<sub>4</sub>. The solvent was removed under reduced pressure. The resulting solid was washed with a small amount of hexane, filtered off and dried to yield the desired product **4a** (7.62 g, 79 %) as a white powder. Mp 124 – 126 °C;  $\nu_{max}$  (cm<sup>-1</sup>): 2961, 2920, 2857, 1464, 1360, 1283, 1161, 1001, 968, 868, 853,

833, 694, 660;  $^1\text{H}$  NMR (500 MHz,  $\text{CDCl}_3$ ):  $\delta$  (ppm) 7.20 (s, 2H), 6.98 (t, 2H,  $J = 1.1$  Hz), 5.65 (t, 2H,  $J = 1.1$  Hz), 1.64 (s, 4H), 1.24 (s, 12H);  $^{13}\text{C}$  NMR (126 MHz,  $\text{CDCl}_3$ ):  $\delta$  (ppm) 145.3, 142.6, 140.9, 118.6, 82.3, 35.2, 34.4, 31.8, 31.7; HRMS (EI,  $m/z$ ):  $[\text{M}^+]$  calcd.: 254.1665, found: 254.1677.

**2,3-Dihydro-1,1,2,2,3,3-hexamethyl-1H-5,8-epoxybenz[f]indene (4b)**

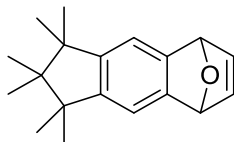

The compound 2,3-dihydro-1,1,2,2,3,3-hexamethyl-1H-5,8-epoxybenz[f]indene (**4b**) was prepared according to the general procedure reported by Luo *et al.*<sup>18</sup> 5,6-Dibromo-2,3-dihydro-1,1,2,2,3,3-hexamethyl-1H-indene (**3b**) (4.00 g, 11.1 mmol) and anhydrous furan (7.27 mL, 100 mmol) were dissolved in anhydrous THF (15 mL) and cooled to  $-78$  °C. To this, a solution of *n*-BuLi (5.78 mL, 14.4 mmol) in anhydrous THF (5 mL) was added dropwise and left to stir at  $-78$  °C for 1.5 h. The resulting solution was allowed to warm to room temperature and water was added. The organic layer was extracted with DCM and dried over  $\text{MgSO}_4$ . The solvent was removed under vacuum and the precipitated solid was washed with hexane, filtered off and dried to yield **4b** (1.68 g, 56 %) as a white powder. Mp  $132 - 133$  °C;  $\nu_{\text{max}}$  ( $\text{cm}^{-1}$ ): 3003, 2986, 2947, 2864, 1447, 1375, 1368, 1281, 1148, 1123, 999, 897, 889, 866, 849, 772, 748, 704, 652, 613, 550, 538, 527, 505;  $^1\text{H}$  NMR (500 MHz,  $\text{CDCl}_3$ ):  $\delta$  (ppm) 7.02 (t, 2H,  $J = 1.1$  Hz), 7.00 (s, 2H), 5.65 (t, 2H,  $J = 1.1$  Hz), 1.15 (s, 6H), 1.14 (s, 6H), 0.86 (s, 3H), 0.85 (s, 3H);  $^{13}\text{C}$  NMR (126 MHz,  $\text{CDCl}_3$ ):  $\delta$  (ppm) 147.6, 147.0, 143.1, 115.3, 82.6, 48.9, 47.4, 27.6, 27.3, 21.8, 21.5; HRMS (EI,  $m/z$ ):  $[\text{M}^+]$  calcd.: 268.1822, found: 268.1831.

**1,4-Dihydro-1,4-epoxynaphthalene (4c)**

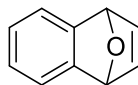

The compound 1,4-dihydro-1,4-epoxynaphthalene (**4c**) was prepared according to the general procedure reported by Luo *et al.*<sup>18</sup> 1,2-Dibromobenzene (30.0 g, 127 mmol) and anhydrous furan (83.1 mL, 1143 mmol) were dissolved in anhydrous THF (40 mL) and cooled to  $-78$  °C. *n*-BuLi (66.2 mL, 165 mmol) in anhydrous THF (20 mL) was added dropwise and left to stir at  $-78$  °C for 1.5 h. The solution was allowed to warm to room temperature and water was added. The organic layer was extracted with DCM and dried over  $\text{MgSO}_4$ . The resulting solid after solvent removal was washed with hexane, filtered off and dried to yield **4c** (7.34 g, 40 %) as a white solid. Mp  $56 - 57$  °C;  $\nu_{\text{max}}$  ( $\text{cm}^{-1}$ ): 3021, 1450, 1279, 987, 871, 845;  $^1\text{H}$  NMR (500 MHz,  $\text{CDCl}_3$ ):  $\delta$  (ppm) 7.25 (dd, 2H,  $J = 5.0, 2.9$  Hz),

7.03 (t, 2H,  $J = 1.1$  Hz), 6.97 (dd, 2H,  $J = 5.1, 3.0$  Hz), 5.71 (t, 2H,  $J = 1.1$  Hz);  $^{13}\text{C}$  NMR (126 MHz,  $\text{CDCl}_3$ ):  $\delta$  (ppm) 149.2, 143.2, 125.1, 120.4, 82.5; LRMS (EI,  $m/z$ ):  $[\text{M}^+]$  calcd.: 144.06, found: 144.0.

#### **1,4-Dihydro-6,7-dimethyl-1,4-epoxynaphthalene (4d)**

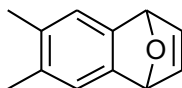

Following the general procedure reported by Luo *et al.*<sup>18</sup> 1,2-dibromo-4,5-dimethylbenzene (20.0 g, 75.8 mmol) and anhydrous furan (49.6 mL, 682 mmol) were dissolved in anhydrous THF (40 mL) and cooled to  $-78$  °C. *n*-BuLi (39.4 mL, 98.5 mmol) in anhydrous THF (20 mL) was added dropwise and left to stir for 1.5 h. The solution was allowed to reach room temperature and water was added. The organic layer was extracted with DCM and dried over  $\text{MgSO}_4$ . After solvent removal, the resulting solid was washed with hexane, filtered off and dried to yield 1,4-dihydro-6,7-dimethyl-1,4-epoxynaphthalene (**4d**) (10.1 g, 77 %) as a white solid. Mp  $67 - 68$  °C;  $\nu_{\text{max}}$  ( $\text{cm}^{-1}$ ): 2920, 1458, 1389, 1277, 1072, 1038, 976, 868, 841, 694, 637;  $^1\text{H}$  NMR (500 MHz,  $\text{CDCl}_3$ ):  $\delta$  (ppm) 7.06 (s, 2H), 7.00 (t, 2H,  $J = 1.0$  Hz), 5.66 (t, 2H,  $J = 1.0$  Hz), 2.20 (s, 6H);  $^{13}\text{C}$  NMR (126 MHz,  $\text{CDCl}_3$ ):  $\delta$  (ppm) 146.8, 143.3, 132.7, 122.3, 82.4, 19.9; LRMS (EI,  $m/z$ ):  $[\text{M}^+]$  calcd.: 172.09, found: 172.1.

#### **6-Trifluoromethyl-1,4-dihydro-1,4-epoxynaphthalene (4e)**

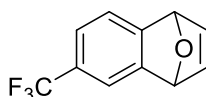

The compound 6-(trifluoromethyl)-1,4-dihydro-1,4-epoxynaphthalene (**4e**) was synthesised according to the procedure reported by Bailly *et al.*<sup>19</sup> 4-Chlorobenzotrifluoride (10.0 g, 55.4 mmol) was dissolved in anhydrous THF (80 mL) and cooled to  $-78$  °C. *n*-BuLi (29.0 mL, 72.0 mmol) was added dropwise and left to stir at  $-78$  °C for 1 h. The reaction solution was transferred dropwise into furan (40.0 mL, 552 mmol) and left at room temperature for 2 h. After solvent removal, the crude product was filtered through a pad of basic aluminium using diethyl ether as eluent. The resulting oil was distilled under vacuum to yield pure 1,4-dihydro-6-(trifluoromethyl)-1,4-epoxynaphthalene (**4e**) as a colourless oil (5.68 g, 48 %).  $\nu_{\text{max}}$  ( $\text{cm}^{-1}$ ): 3019, 2359, 2324, 1427, 1354, 1323, 1275, 1198, 1167, 1140, 1049, 995, 897, 872, 853, 839, 750, 700, 654, 637, 544;  $^1\text{H}$  NMR (500 MHz,  $\text{CDCl}_3$ ):  $\delta$  (ppm) 7.46 (s, 1H), 7.32 (d, 1H,  $J = 7.4$  Hz), 7.30 (d, 1H,  $J = 7.4$  Hz), 7.07-7.03 (m, 2H), 5.57-5.76 (m, 2H);  $^{13}\text{C}$  NMR (151 MHz,  $\text{CDCl}_3$ ):  $\delta$  (ppm) 153.4, 150.5, 143.3, 142.8, 127.6 (q,  $J = 33$  Hz), 127.0, 125.3, 123.4, 123.2 (q,  $J = 4$  Hz), 121.6, 120.1, 117.1 (q,  $J = 4$  Hz), 82.3; LRMS (EI,  $m/z$ ):  $[\text{M}^+]$  calcd.: 212.04, found: 212.0.



### 5,7-Bis(trifluoromethyl)-1,4-dihydro-1,4-epoxynaphthalene (**4f**)

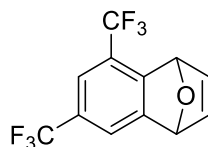

The compound 5,7-bis(trifluoromethyl)-1,4-dihydro-1,4-epoxynaphthalene (**4f**) was obtained according to the procedure reported by Bailly *et al.*<sup>19</sup> 2,4-Bis(trifluoromethyl)chlorobenzene (10.0 g, 40.2 mmol) was dissolved into anhydrous THF (80 mL) and cooled to -78 °C. To this, a solution of *n*-BuLi was added dropwise and left to stir at -78 °C for 1 h. The resulting solution was transferred into anhydrous furan (88.0 mL, 1207 mmol) and kept at room temperature for 24 h. Solvent was removed under vacuum and the resulting oil was filtered through a pad of basic aluminium (diethyl ether as eluent). The desired product **4f** was obtained by distillation under vacuum as colourless oil (4.5 g, 40 %).  $\nu_{\max}(\text{cm}^{-1})$ : 3036, 1389, 1325, 1287, 1256, 1192, 1175, 1142, 1069, 899, 872, 843, 820, 752, 704, 667, 635, 625;  $^1\text{H NMR}$  (400 MHz,  $\text{CDCl}_3$ ):  $\delta$  (ppm) 7.61 (s, 1H), 7.49 (s, 1H), 7.11 (dd, 1H,  $J = 5.5, 1.9$  Hz), 7.06 (dd, 1H,  $J = 5.5, 1.9$  Hz), 6.08 – 6.01 (m, 1H), 5.87 – 5.81 (m, 1H);  $^{13}\text{C NMR}$  (126 MHz,  $\text{CDCl}_3$ ):  $\delta$  (ppm) 152.5, 144.0, 142.3, 128.8 (q,  $J = 33$  Hz), 126.8, 126.6, 124.6, 124.4, 124.0 (q,  $J = 35$  Hz), 122.5, 122.3, 119.5 (dt,  $J = 8, 4$  Hz), 81.9, 81.6 (q,  $J = 2$  Hz); HRMS (EI,  $m/z$ ):  $[\text{M}^+]$  calcd.: 280.0317, found: 280.0317.

### General procedure for the synthesis of the oxygen-bridged tetramethoxy benzotriptycenes (**5a-f**)

The oxygen-bridged tetramethoxy benzotriptycenes (**5a-f**) were synthesised according to a modified procedure reported by Sydlik *et al.*<sup>20</sup> In a sealed vessel, 2,3,6,7-tetramethoxy-9,10-dimethylantracene (2.00 g, 6.13 mmol) prepared following the method reported by Ghanem *et al.*<sup>21</sup>, and the required epoxyarene (**4a-f**) (6.13 mmol) were dissolved in DMF (15 mL) and heated in microwave reactor at 250 °C for 2 h at a pressure of 7 bar. The resulting solution was poured into water, and the precipitate was collected by filtration and thoroughly washed with water.

### 2,3,6,7-Tetramethoxy-9,10-(1',3',4',5',6',8'-hexahydro-2',2',5',5'-tetramethyl-1',8'-epoxyanthryl)-9,10-dimethylantracene (**5a**)

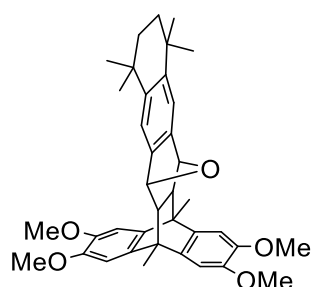

Following the general procedure described above, the crude product was purified by column chromatography DCM/ethyl acetate (9:1 v/v) to yield adduct **5a** (77 %) as a light brown crystalline

solid. Mp 288 – 290 °C;  $\nu_{max}$  (cm<sup>-1</sup>): 2934, 1506, 1489, 1437, 1404, 1279, 1242, 1227, 1196, 1163, 1049, 1032, 854, 835, 822, 785, 748; <sup>1</sup>H NMR (500 MHz, CDCl<sub>3</sub>):  $\delta$  (ppm) 7.03 (s, 2H), 6.87 (s, 2H), 6.84 (s, 2H), 4.92 (s, 2H), 3.89 (s, 6H), 3.83 (s, 6H), 2.07 (s, 6H), 1.99 (s, 2H), 1.60 (s, 4H), 1.19 (s, 12H); <sup>13</sup>C NMR (126 MHz, CDCl<sub>3</sub>):  $\delta$  (ppm) 146.8, 146.4, 144.1, 142.5, 140.5, 136.8, 116.4, 106.7, 106.0, 79.6, 56.8, 56.4, 56.4, 43.1, 35.2, 34.4, 32.1, 31.9, 17.1; HRMS (EI,  $m/z$ ): [M<sup>+</sup>] calcd.: 580.3183, found: 580.3180.

**2,3,6,7-Tetramethoxy-9,10-(2',8'4',5'-tetrahydro-4',4',5',5',6',6'-hexamethyl-3'H-1',8'-epoxyindenyl)-9,10-dimethylantracene (5b)**

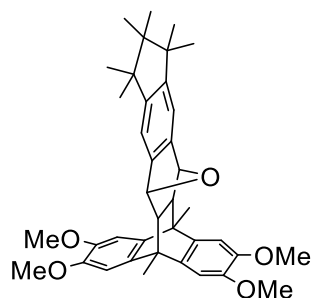

Following the general procedure, the crude product was purified by trituration with hexane to yield adduct **5b** as an off white solid (63 %). Mp 125 – 127 °C;  $\nu_{max}$  (cm<sup>-1</sup>): 2936, 1485, 1458, 1281, 1242, 1196, 1150, 1045, 1022, 853, 748, 610, 567; <sup>1</sup>H NMR (500 MHz, CDCl<sub>3</sub>):  $\delta$  (ppm) 6.87 (s, 2H), 6.84 (s, 2H), 6.83 (s, 2H), 4.92 (s, 2H), 3.89 (s, 6H), 3.83 (s, 6H), 2.07 (s, 6H), 2.01 (s, 2H), 1.10 (s, 12H), 0.81 (s, 3H), 0.79 (s, 3H); <sup>13</sup>C NMR (151 MHz, CDCl<sub>3</sub>):  $\delta$  (ppm) 148.6, 147.0, 146.5, 145.9, 140.7, 137.0, 113.1, 106.8, 106.1, 79.8, 56.9, 56.6, 56.5, 48.7, 47.5, 43.3, 27.9, 27.4, 21.8, 21.5, 17.3; HRMS (EI,  $m/z$ ): [M<sup>+</sup>] calcd.: 594.3340, found: 594.3339.

**2,3,6,7-Tetramethoxy-9,10-(2',7'-dihydro-2',7'-epoxynaphthalene)-9,10-dimethylantracene (5c)**

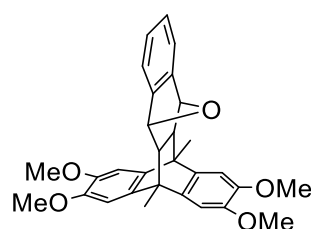

Following the general procedure, the crude product was purified by trituration with methanol to yield adduct **5c** (83 %) as an off-white solid. Mp 110 – 112 °C;  $\nu_{max}$  (cm<sup>-1</sup>): 2932, 1508, 1485, 1458, 1404, 1331, 1281, 1242, 1223, 1192, 1153, 1045, 1018, 949, 922, 841, 752, 606, 575; <sup>1</sup>H NMR (400 MHz, CDCl<sub>3</sub>):  $\delta$  (ppm) 7.12 (dd, 2H,  $J$  = 5.3, 3.0 Hz), 7.02 (dd, 2H,  $J$  = 5.3, 3.0 Hz), 6.87 (s, 2H), 6.84 (s, 2H), 4.99 (s, 2H), 3.89 (s, 6H), 3.83 (s, 6H), 2.08 (s, 6H), 2.01 (s, 2H); <sup>13</sup>C NMR (126 MHz, CDCl<sub>3</sub>):  $\delta$  (ppm) 147.1, 147.1, 146.6, 140.5, 136.9, 126.4, 118.7, 106.8, 106.2, 79.8, 56.6, 56.5, 56.4, 43.2, 17.3; HRMS (EI,  $m/z$ ): [M<sup>+</sup>] calcd.: 470.2088, found: 470.2108.

**2,3,6,7-Tetramethoxy-9,10-(2',7'-dihydro-4',5'-dimethyl-2',7'-epoxynaphthalene)-9,10-dimethylantracene (5d)**

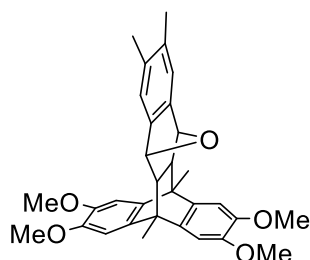

Following the general procedure described above, the crude product was purified by trituration with hexane to yield adduct **5d** (78 %) as an off-white solid. Mp 238 – 240 °C;  $\nu_{\max}$  ( $\text{cm}^{-1}$ ): 2936, 1491, 1464, 1406, 1292, 1246, 1196, 1161, 1043, 856, 821, 783, 752, 673, 611, 570;  $^1\text{H}$  NMR (500 MHz,  $\text{CDCl}_3$ ):  $\delta$  (ppm) 6.90 (s, 2H), 6.86 (s, 2H), 6.82 (s, 2H), 4.93 (s, 2H), 3.88 (s, 6H), 3.82 (s, 6H), 2.16 (s, 6H), 2.05 (s, 2H), 1.96 (s, 2H);  $^{13}\text{C}$  NMR (126 MHz,  $\text{CDCl}_3$ ):  $\delta$  (ppm) 147.0, 146.5, 145.0, 140.6, 136.9, 134.3, 120.1, 106.7, 106.1, 79.6, 56.9, 56.6, 56.5, 43.2, 20.0, 17.3; HRMS (EI,  $m/z$ ):  $[\text{M}^+]$  calcd.: 498.2401, found: 498.2410.

**2,3,6,7-Tetramethoxy-9,10-(4'-trifluoromethyl-2',7'-dihydro-2',7'-epoxynaphthalene)-9,10-dimethylantracene (5e)**

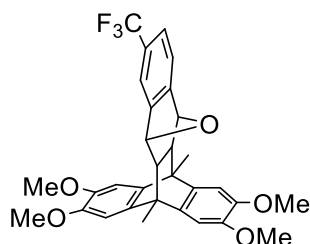

Following the general procedure, the crude product was purified by column chromatography DCM/ethyl acetate (20:1 v/v) to yield adduct **5e** as light brown crystalline solid (52 %). Mp 138 – 140 °C;  $\nu_{\max}$  ( $\text{cm}^{-1}$ ): 2938, 1506, 1485, 1462, 1437, 1404, 1319, 1292, 1279, 1196, 1148, 1113, 1045, 1020, 951, 885, 843, 818, 783, 746, 677, 669, 660, 606, 579;  $^1\text{H}$  NMR (601 MHz,  $\text{CDCl}_3$ ):  $\delta$  (ppm) 7.38 (s, 1H), 7.34 (d, 1H,  $J = 7.7$  Hz), 7.22 (d, 1H,  $J = 7.6$  Hz), 6.88 (s, 1H), 6.87 (s, 1H), 6.84 (s, 2H), 5.05 (d, 2H,  $J = 1.9$  Hz), 3.89 (s, 3H), 3.89 (s, 3H), 3.84 (s, 6H), 2.08 (s, 6H), 2.04 – 2.00 (m, 2H);  $^{13}\text{C}$  NMR (151 MHz,  $\text{CDCl}_3$ ):  $\delta$  (ppm) 150.9, 148.0, 147.1, 146.7, 146.7, 140.2, 140.1, 136.6, 136.6, 128.9 (q,  $J = 32$  Hz), 127.6, 125.4, 124.1 (t,  $J = 4$  Hz), 123.3, 121.1, 118.9, 115.8 (q,  $J = 4$  Hz), 106.7, 106.7, 106.2, 106.1, 79.6, 79.6, 56.6, 56.5, 56.0, 55.8, 43.1, 17.3, 17.2; HRMS (EI,  $m/z$ ):  $[\text{M}^+]$  calcd.: 538.1962, found: 538.1969.

**2,3,6,7-Tetramethoxy-9,10-(3',5'-bis(trifluoromethyl)-2',7'-dihydro-2',7'-epoxynaphthalene)-9,10-dimethylanthracene (5f)**

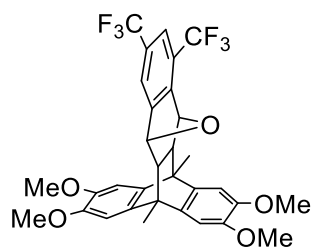

Following the general procedure, the crude product was purified by trituration with MeOH to adduct **5f** as light brown powder (58 %). Mp 166 – 168 °C;  $\nu_{\max}$  ( $\text{cm}^{-1}$ ): 2965, 2938, 2830, 1506, 1487, 1464, 1404, 1385, 1327, 1277, 1254, 1242, 1194, 1159, 1121, 1074, 1045, 1020, 949, 895, 870, 835, 820, 783, 752, 687, 673, 633, 608, 571;  $^1\text{H}$  NMR (400 MHz,  $\text{CDCl}_3$ ):  $\delta$  (ppm) 7.56 (s, 2H), 6.90 (s, 1H), 6.88 (s, 1H), 6.85 (s, 1H), 6.84 (s, 1H), 5.31 (s, 1H), 5.14 (s, 1H), 3.90 (s, 3H), 3.90 (s, 3H), 3.84 (s, 3H), 3.83 (s, 3H), 2.09 (s, 3H), 2.08 (s, 3H), 2.03 (s, 2H);  $^{13}\text{C}$  NMR (126 MHz,  $\text{CDCl}_3$ ):  $\delta$  (ppm) 149.9, 147.3, 147.3, 146.9, 146.8, 139.9, 136.4, 136.3, 130.1, 122.4, 120.7, 119.0, 106.9, 106.8, 106.3, 106.2, 79.4, 79.2, 56.6, 56.6, 56.5, 56.5, 55.7, 55.0, 43.1, 43.1, 17.2, 16.9; HRMS (EI, m/z):  $[\text{M}^+]$  calcd.: 606.1835, found: 606.1855.

**General procedure for the synthesis of the tetramethoxy benzotriptycenes (6a-f)**

The required oxygen-bridged benzotriptycene (**5a-f**) was dissolved in TFA (or  $\text{MeSO}_4\text{H}$  in the case of the adducts with  $\text{CF}_3$  groups) and left at room temperature for 24 h. The reaction mixture was poured into ice – water bath, neutralised with aqueous sodium hydroxide (2N), extracted with DCM and dried over  $\text{MgSO}_4$ . The crude product was obtained after solvent removal.

**2,3,6,7-Tetramethoxy-9,10-dimethyl-[12,13]-(3',3',6',6'-tetramethyl-3',4',5',6'-tetrahydronaphtho)triptycene (6a)**

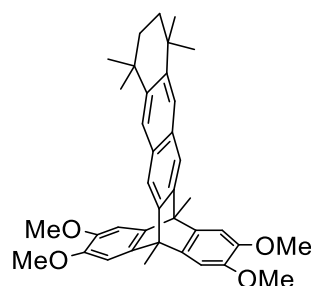

Following the general procedure, the crude product was then purified by column chromatography ( $\text{CHCl}_3$ ) to yield compound **6a** (62 %) as a white powder. Mp above 300 °C;  $\nu_{\max}$  ( $\text{cm}^{-1}$ ): 2955, 2928, 2859, 1601, 1489, 1462, 1439, 1404, 1285, 1250, 1165, 1146, 1042, 903, 868, 856, 764, 752, 633, 621, 536;  $^1\text{H}$  NMR (500 MHz,  $\text{CDCl}_3$ ):  $\delta$  (ppm) 7.64 (s, 2H), 7.56 (s, 2H), 6.96 (s, 4H), 3.84 (s, 12H), 2.47 (s, 6H), 1.71 (s, 4H), 1.31 (s, 12H);  $^{13}\text{C}$  NMR (126 MHz,  $\text{CDCl}_3$ ):  $\delta$  (ppm) 146.1, 145.0, 143.9, 140.8,

129.5, 124.5, 117.4, 106.0, 56.4, 47.4, 35.1, 34.4, 32.5, 14.2; HRMS (EI,  $m/z$ ):  $[M^+]$  calcd.: 562.3077, found: 562.3068.

**2,3,6,7-Tetramethoxy-9,10-dimethyl-[12,13]-(3',3',4',4',5',5'-hexamethyl-3',4'-dihydro-1'H-indeno)triptycene (6b)**

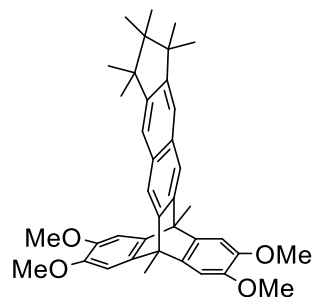

Following the general procedure, the crude product was then purified by trituration with hexane to yield compound **6b** (78 %) as a white powder. Mp 180 – 182 °C;  $\nu_{\max}$  ( $\text{cm}^{-1}$ ): 2947, 1485, 1458, 1435, 1404, 1281, 1227, 1165, 1146, 1042, 1022, 899, 752, 621;  $^1\text{H}$  NMR (601 MHz,  $\text{CDCl}_3$ ):  $\delta$  (ppm) 7.63 (s, 2H), 7.43 (s, 2H), 6.96 (s, 4H), 3.84 (s, 12H), 2.48 (s, 6H), 1.24 (s, 12H), 0.85 (s, 6H);  $^{13}\text{C}$  NMR (126 MHz,  $\text{CDCl}_3$ ):  $\delta$  (ppm) 150.5, 146.2, 145.1, 141.1, 131.2, 120.5, 118.0, 106.1, 56.6, 48.9, 47.6, 47.5, 28.0, 21.6, 14.3; HRMS (EI,  $m/z$ ):  $[M^+]$  calcd.: 576.3234, found: 576.3239.

**2,3,6,7-Tetramethoxy-9,10-dimethylbenzotriptycene (6c)**

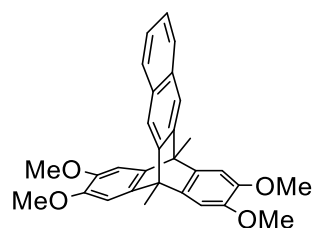

Following the general procedure, the crude product was then purified by trituration with ethanol to yield compound **6c** (84 %) as a white powder. Mp 123 – 125 °C;  $\nu_{\max}$  ( $\text{cm}^{-1}$ ): 2967, 2936, 1601, 1485, 1458, 1431, 1404, 1281, 1223, 1192, 1165, 1146, 1042, 1018, 945, 883, 860, 756, 617, 579;  $^1\text{H}$  NMR (500 MHz,  $\text{CDCl}_3$ ):  $\delta$  (ppm) 7.70 (dd, 2H,  $J = 6.1, 3.3$  Hz), 7.65 (s, 2H), 7.36 (dd, 2H,  $J = 6.2, 3.2$  Hz), 6.98 (s, 4H), 3.85 (s, 12H), 2.50 (s, 6H);  $^{13}\text{C}$  NMR (126 MHz,  $\text{CDCl}_3$ ):  $\delta$  (ppm) 146.3, 146.0, 140.9, 131.4, 127.6, 125.8, 118.4, 106.2, 56.5, 47.7, 14.3; HRMS (EI,  $m/z$ ):  $[M^+]$  calcd.: 452.1982, found: 452.1969.

**2,3,6,7-Tetramethoxy-9,10-dimethyl-13,14-dimethylbenzotriptycene (6d)**

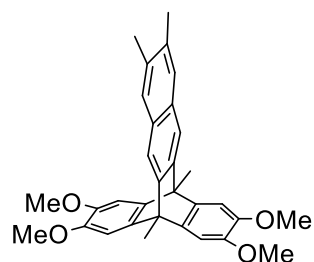

Following the general procedure, the crude product was then purified by column chromatography DCM/metanol (100:1 v/v) to yield compound **6d** (84 %) as a white powder. Mp 278 – 280 °C;  $\nu_{\max}$  ( $\text{cm}^{-1}$ ): 2936, 1483, 1435, 1402, 1278, 1224, 1147, 1042, 1018, 895, 752, 617, 549;  $^1\text{H}$  NMR (500 MHz,  $\text{CDCl}_3$ ):  $\delta$  (ppm) 7.53 (s, 2H), 7.44 (s, 2H), 6.97 (s, 4H), 3.84 (s, 12H), 2.47 (s, 6H), 2.34 (s, 6H);  $^{13}\text{C}$  NMR (126 MHz,  $\text{CDCl}_3$ ):  $\delta$  (ppm) 146.1, 144.9, 141.0, 135.1, 130.1, 127.1, 117.3, 106.0, 56.4, 47.5, 20.1, 14.2; HRMS (EI, m/z):  $[\text{M}^+]$  calcd.: 480.2295, found: 480.2277.

**2,3,6,7-Tetramethoxy-9,10-dimethyl-13-trifluoromethylbenzotriptycene (6e)**

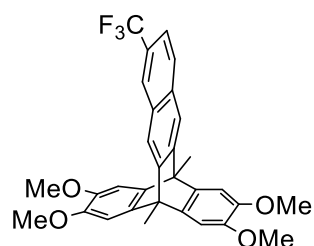

Following the general procedure, the crude product was purified by column chromatography DCM/ethyl acetate (40:1 v/v) to afford compound **6e** (93 %) as a white solid. Mp 289 – 291 °C;  $\nu_{\max}$  ( $\text{cm}^{-1}$ ): 2951, 1604, 1585, 1516, 1489, 1443, 1408, 1384, 1327, 1281, 1258, 1223, 1184, 1146, 1111, 1065, 1038, 934, 903, 887, 872, 837, 814, 795, 752, 698, 679, 667, 640, 617, 598, 559;  $^1\text{H}$  NMR (500 MHz,  $\text{CDCl}_3$ ):  $\delta$  (ppm) 8.01 (s, 1H), 7.80 (d, 1H,  $J = 8.6$  Hz), 7.72 (s, 1H), 7.70 (s, 1H), 7.54 (dd, 1H,  $J = 8.6, 1.8$  Hz), 6.99 (s, 4H), 3.86 (s, 6H), 3.86 (s, 6H), 2.51 (s, 3H), 2.51 (m, 3H);  $^{13}\text{C}$  NMR (126 MHz,  $\text{CDCl}_3$ ):  $\delta$  (ppm) 148.6, 147.7, 146.5, 146.5, 140.5, 140.4, 132.9, 130.4, 128.5, 128.0, 127.9, 127.6 (q,  $J = 32$  Hz), 125.7, 125.2 (q,  $J = 4$  Hz), 123.6, 121.5 (q,  $J = 3$  Hz), 119.0, 118.2, 106.2, 106.2, 56.5, 47.8, 47.7, 14.3;  $[\text{M}^+]$  calcd.: 520.1856, found: 520.1881.

**2,3,6,7-Tetramethoxy-9,10-dimethyl-12,14-bis(trifluoromethyl)benzotriptycene (6f)**

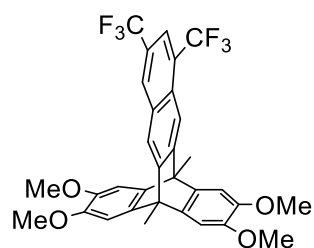

Following the general procedure, the crude product was purified by column chromatography (DCM) to yield **6f** as a white solid (93 %). Mp 272 – 274 °C;  $\nu_{\max}$  ( $\text{cm}^{-1}$ ): 2970, 2940, 2830, 1607, 1582, 1487, 1449, 1439, 1406, 1385, 1344, 1275, 1209, 1186, 1152, 1115, 1088, 1042, 1016, 959, 899, 887, 870, 762, 752, 733, 667, 613;  $^1\text{H}$  NMR (601 MHz,  $\text{CDCl}_3$ ):  $\delta$ (ppm) 8.20 (s, 1H), 8.04 (s, 1H), 7.92 (s, 1H), 7.80 (s, 1H), 7.01 (s, 2H), 6.99 (s, 2H), 3.87 (s, 6H), 3.86(s, 6H), 2.54 (s, 3H), 2.52 (s, 3H);  $^{13}\text{C}$  NMR (126 MHz,  $\text{CDCl}_3$ ):  $\delta$  (ppm) 150.6, 148.6, 146.7, 146.7, 140.1, 140.0, 131.5, 129.7 (q,  $J = 4$  Hz), 128.7 (q,  $J = 33$  Hz), 126.4 (q,  $J = 33$  Hz), 125.4, 125.0, 123.2, 122.8, 120.4 (dt,  $J = 8, 4$  Hz), 119.7, 114.8,

106.3, 106.2, 56.6, 56.5, 48.2, 47.7, 14.1, 14.1; HRMS (EI,  $m/z$ ):  $[M^+]$  calcd.: 588.1730, found: 588.1746.

### **General procedure for the synthesis of the biscatechol monomers (1a-f)**

The required biscatechol monomers were synthesised according to the general procedure reported by Ghanem *et al.*<sup>21</sup> The tetramethoxy benzotriptycene precursor (**6a-f**) (2.00 mmol) was dissolved in anhydrous DCM (40 mL) and cooled to 0 °C.  $BBr_3$  (6.00 mmol) was added dropwise and left at 0 °C for 30 minutes, then allowed to warm to room temperature for 2.5 h. The resulting reaction was poured into ice – water and allowed DCM to evaporate. Then, the precipitate was filtered off, washed with water and dried. The crude product was dissolved in ethyl acetate and dried over  $MgSO_4$ . After most of the solvent removal, the product was precipitated from hexane and filtered off.

### **2,3,6,7-Tetrahydroxy-9,10-dimethyl-[12,13]-(3',3',6',6'-tetramethyl-3',4',5',6'-tetrahydronaphtho)triptycene (Monomer TMN-Trip) (1a)**

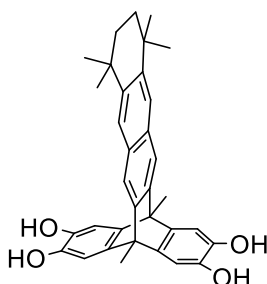

This compound was attained as a white powder in a 92 % yield.  $\nu_{max}$  ( $cm^{-1}$ ): 3121, 2951, 2228, 1592, 1491, 1442, 1376, 1299, 1265, 1163, 969, 865, 763, 680;  $^1H$  NMR (500 MHz,  $(CD_3)_2CO$ ):  $\delta$  (ppm) 7.72 (s, 2H), 7.56 (s, 2H), 7.44 (s, 4H), 6.88 (s, 4H), 2.32 (s, 6H), 1.72 (s, 4H), 1.33 (s, 12H);  $^{13}C$  NMR (126 MHz,  $(CD_3)_2CO$ ):  $\delta$  (ppm) 147.0, 144.1, 141.1, 130.7, 125.4, 117.8, 109.8, 47.5, 35.9, 35.0, 32.8, 14.6; HRMS (EI,  $m/z$ ):  $[M^+]$  calcd.: 506.2451, found: 506.2455.

### **2,3,6,7-Tetrahydroxy-9,10-dimethyl-[12,13]-(3',3',4',4',5',5'-hexamethyl-3',4'-dihydro-1'H-indeno)triptycene (Monomer HMI-Trip) (1b)**

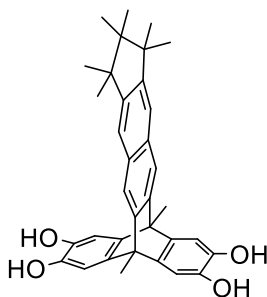

This compound was obtained as a white powder in a 77 % yield.  $\nu_{max}$  ( $cm^{-1}$ ): 3368, 2955, 1612, 1485, 1447, 1377, 1296, 1169, 984, 903, 876, 837, 814, 760, 621;  $^1H$  NMR (601 MHz,  $(CD_3)_2CO$ ):  $\delta$  (ppm) 7.61 (s, 2H), 7.49 (s, 2H), 7.44 (bs, 4H), 6.88 (s, 4H), 2.32 (s, 6H), 1.25 (s, 12H), 0.87 (s, 6H);  $^{13}C$  NMR

(126 MHz,  $(\text{CD}_3)_2\text{CO}$ ):  $\delta$  (ppm) 150.6, 146.8, 142.2, 141.2, 132.2, 121.2, 118.4, 109.8, 49.3, 48.0, 47.5, 28.2, 21.8, 14.6; HRMS (EI,  $m/z$ ):  $[\text{M}^+]$  calcd.: 520.2608, found: 520.2608.

**2,3,6,7-Tetrahydroxy-9,10-dimethylbenzotriptycene (Monomer BTrip) (1c)**

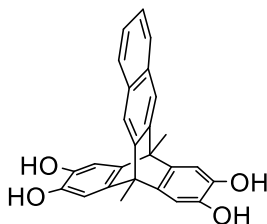

This compound was accomplished as a white powder in a 73 % yield.  $\nu_{\text{max}}$  ( $\text{cm}^{-1}$ ): 3326, 2981, 1695, 1612, 1491, 1440, 1378, 1293, 1248, 1170, 983, 882, 800, 764, 665, 619;  $^1\text{H}$  NMR (500 MHz,  $(\text{CD}_3)_2\text{CO}$ ):  $\delta$  (ppm) 7.75 (dd, 2H,  $J = 6.1, 3.3$  Hz), 7.67 (s, 2H), 7.48 (bs, 4H), 7.35 (dd, 2H,  $J = 6.2, 3.2$  Hz), 6.91 (s, 4H), 2.34 (s, 6H);  $^{13}\text{C}$  NMR (126 MHz,  $(\text{CD}_3)_2\text{CO}$ ):  $\delta$  (ppm) 148.0, 142.3, 141.0, 132.3, 128.2, 126.2, 118.5, 109.9, 47.6, 14.6; HRMS (EI,  $m/z$ ):  $[\text{M}^+]$  calcd.: 396.1356, found: 396.1361.

**2,3,6,7-Tetrahydroxy-9,10-dimethyl-13,14-dimethylbenzotriptycene (Monomer DM-BTrip) (1d)**

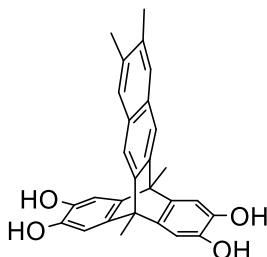

This compound was attained as a white powder in a 76 % yield.  $\nu_{\text{max}}$  ( $\text{cm}^{-1}$ ): 3363, 2968, 1622, 1497, 1446, 1379, 1290, 1173, 897, 835, 765, 615, 548;  $^1\text{H}$  NMR (601 MHz,  $(\text{CD}_3)_2\text{CO}$ ):  $\delta$  (ppm) 7.54 (s, 2H), 7.48 (s, 2H), 7.44 (bs, 4H), 6.88 (s, 4H), 2.33 (s, 6H), 2.31 (s, 6H);  $^{13}\text{C}$  NMR (126 MHz,  $(\text{CD}_3)_2\text{CO}$ ):  $\delta$  (ppm) 147.2, 142.3, 141.4, 136.6, 131.2, 128.1, 117.8, 110.0, 47.7, 20.2, 14.7; HRMS (EI,  $m/z$ ):  $[\text{M}^+]$  calcd.: 424.1669, found: 424.1662.

**2,3,6,7-Tetrahydroxy-9,10-dimethyl-13-trifluoromethylbenzotriptycene (Monomer TFM-BTrip) (1e)**

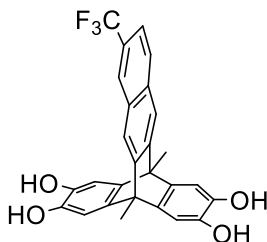

This compound was obtained as a white powder in a 65 % yield.  $\nu_{\text{max}}$  ( $\text{cm}^{-1}$ ): 3352, 2970, 1612, 1487, 1443, 1379, 1329, 1298, 1263, 1186, 1155, 1117, 1065, 986, 934, 907, 843, 812, 762, 619, 598;  $^1\text{H}$  NMR (601 MHz, MeOD):  $\delta$  (ppm) 8.04 (s, 1H), 7.84 (d, 1H,  $J = 9.0$  Hz), 7.69 (s, 1H), 7.65 (s, 1H), 7.51 (dd, 1H,  $J = 8.6, 1.9$  Hz), 6.84 (s, 4H), 2.31 (s, 6H);  $^{13}\text{C}$  NMR (151 MHz, MeOD):  $\delta$  (ppm) 151.1,



150.1, 142.9, 142.8, 141.1, 141.0, 134.3, 131.6, 129.7, 127.9, 127.0, 126.0 (q,  $J = 4$  Hz), 121.7 (q,  $J = 4$  Hz), 119.2, 118.4, 110.1, 110.1, 48.1, 48.0, 14.5, 14.5; HRMS (EI, m/z):  $[M^+]$  calcd.: 464.1229, found: 464.1229.

**2,3,6,7-Tetrahydroxy-9,10-dimethyl-12,14-bis(trifluoromethyl)benzotriptycene (Monomer DTFM-BTrip) (1f)**

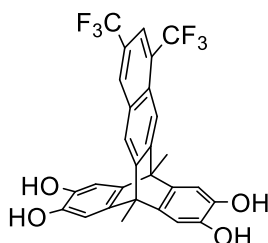

This compound was attained as a white powder in a 92 % yield.  $\nu_{\max}$  ( $\text{cm}^{-1}$ ): 3429, 2974, 1614, 1489, 1445, 1383, 1342, 1298, 1277, 1207, 1188, 1157, 1117, 1088, 1015, 988, 957, 924, 903, 889, 880, 841, 775, 762, 669, 617;  $^1\text{H}$  NMR (400 MHz,  $(\text{CD}_3)_2\text{CO}$ ):  $\delta$  (ppm) 8.53 (s, 1H), 8.08 (s, 1H), 8.01 – 7.98 (m, 2H), 7.63 (bs, 4H), 6.96 (s, 2H), 6.95 (s, 2H), 2.39 (s, 6H);  $^{13}\text{C}$  NMR (126 MHz,  $(\text{CD}_3)_2\text{CO}$ ):  $\delta$  (ppm) 153.0, 150.7, 142.7, 140.2, 140.0, 132.5, 131.3 (q,  $J = 5$  Hz), 129.1, 127.4, 127.2, 126.8 – 125.8 (m), 124.2, 123.9, 120.6, 114.3, 110.3, 110.2, 48.2, 47.8, 14.3, 14.2; HRMS (EI, m/z):  $[M^+]$  calcd.: 532.1104, found: 532.1128.

**General procedure for synthesis of polybenzodioxin polymers.**

The synthesis of the polybenzodioxin polymers (**PIMa-f**) was conducted according to the procedure described by Budd *et al.*<sup>22</sup> The required biscatechol (**1a-f**) (3.00 mmol) and tetrafluoroterephthalonitrile (3.00 mmol) were dissolved in anhydrous DMF (20 mL). Once both monomers were dissolved,  $\text{K}_2\text{CO}_3$  (24 mmol) was added and the resulting mixture was heated to 65 °C for 72 h. After this time, polymer solution was poured into water, acidified with HCl and filtered off. The crude solid was washed thoroughly with water, acetone and methanol, refluxed twice in THF for 12 h to further remove oligomers and subsequently refluxed in MeOH twice for 12 h to remove traces of residual solvent. Finally, the resulting polybenzodioxin-based PIMs were collected by filtration and dried under vacuum at 120 °C for 12 h.

**PIM-TMN-Trip (PIMa):** This polymer was obtained as a yellow powder in a 67 % yield (based on the molecular weight of the repeated unit);  $\nu_{\max}$  ( $\text{cm}^{-1}$ ): 2924, 2239, 1740, 1607, 1435, 1385, 1269, 1155, 1005, 905, 883, 750, 669, 538;  $^1\text{H}$  NMR (601 MHz,  $\text{CDCl}_3$ ):  $\delta$  (ppm) 7.66 (s, 2H), 7.56 (s, 2H), 6.96 (s, 4H), 2.35 (s, 6H), 1.70 (s, 4H), 1.31 (s, 12H);  $^{13}\text{C}$  NMR (76 MHz, solid state):  $\delta$  (ppm) 143.4, 136.9, 129.8, 123.6, 117.3, 108.7, 94.0, 46.9, 33.5, 30.6, 12.2; BET surface area = 1034  $\text{m}^2 \text{g}^{-1}$ ; total pore volume = 0.87  $\text{cm}^3 \text{g}^{-1}$  at  $P/P_0 = 0.98$  from  $\text{N}_2$  adsorption at 77 K; GPC ( $\text{CHCl}_3$ ):  $M_n = 52,300 \text{ g mol}^{-1}$ ,

$M_w = 197,000 \text{ g mol}^{-1}$ ; Temperature at the maximum point of the weight loss ascribed to the generalized decomposition ( $T_d$ ) is  $510 \text{ }^\circ\text{C}$ .

***PIM-HMI-Trip (PIMb)***: This polymer was obtained as a yellow powder in a 58 % yield (based on the molecular weight of the repeated unit);  $v_{\text{max}} \text{ (cm}^{-1}\text{)}$ : 2980, 1435, 1396, 1379, 1296, 1271, 1171, 1155, 1005, 903, 883, 752, 552;  $^1\text{H NMR}$  (500 MHz,  $\text{CDCl}_3$ ):  $\delta$  (ppm) 7.63 (s, 2H), 7.45 (s, 2H), 6.96 (s, 4H), 2.35 (s, 6H), 1.23 (s, 12H), 0.83 (s, 6H);  $^{13}\text{C NMR}$  (76 MHz, solid state):  $\delta$  (ppm) 149.6, 144.7, 140.8, 137.0, 131.4, 118.8, 108.8, 94.2, 46.9, 26.1, 19.4, 12.4; BET surface area =  $1033 \text{ m}^2 \text{ g}^{-1}$ ; total pore volume =  $0.71 \text{ cm}^3 \text{ g}^{-1}$  at  $P/P_o = 0.98$  from  $\text{N}_2$  adsorption at 77 K; GPC ( $\text{CHCl}_3$ ):  $M_n = 61,300 \text{ g mol}^{-1}$ ,  $M_w = 147,800 \text{ g mol}^{-1}$ ; Temperature at the maximum point of the weight loss ascribed to the generalized decomposition ( $T_d$ ) is  $500 \text{ }^\circ\text{C}$ .

***PIM-BTrip (PIMc)***: This polymer was obtained as a yellow powder in a 78 % yield (based on the molecular weight of the repeated unit);  $v_{\text{max}} \text{ (cm}^{-1}\text{)}$ : 2974, 1435, 1296, 1269, 1007, 885, 752, 582;  $^{13}\text{C NMR}$  (76 MHz, solid state):  $\delta$  (ppm) 144.3, 137.4, 131.1, 125.6, 117.9, 108.9, 94.1, 47.1, 12.4; BET surface area =  $911 \text{ m}^2 \text{ g}^{-1}$ ; total pore volume =  $0.63 \text{ cm}^3 \text{ g}^{-1}$  at ( $P/P_o = 0.98$ ); Temperature at the maximum point of the weight loss ascribed to the generalized decomposition ( $T_d$ ) is  $585 \text{ }^\circ\text{C}$ .

***PIM-DM-BTrip (PIMd)***: This polymer was obtained as a yellow powder in a 82 % yield (based on the molecular weight of the repeated unit);  $v_{\text{max}} \text{ (cm}^{-1}\text{)}$ : 2974, 1435, 1294, 1269, 1005, 900, 885, 752, 548;  $^{13}\text{C NMR}$  (76 MHz, solid state):  $\delta$  (ppm) 145.2, 141.2, 136.7, 130.0, 126.0, 117.0, 108.8, 94.4, 47.2, 17.8, 12.4. BET surface area =  $920 \text{ m}^2 \text{ g}^{-1}$ ; total pore volume =  $0.73 \text{ cm}^3 \text{ g}^{-1}$  at ( $P/P_o = 0.98$ ); Temperature at the maximum point of the weight loss ascribed to the generalized decomposition ( $T_d$ ) is  $580 \text{ }^\circ\text{C}$ .

***PIM-TFM-BTrip (PIMe)***: This polymer was obtained as a yellow powder in a 79 % yield (based on the molecular weight of the repeated unit);  $v_{\text{max}} \text{ (cm}^{-1}\text{)}$ : 2974, 1439, 1329, 1294, 1269, 1186, 1163, 1124, 1067, 1005, 885;  $^{13}\text{C NMR}$  (76 MHz, solid state):  $\delta$  (ppm) 144.9, 137.3, 129.7, 127.6, 118.9, 109.3, 94.3, 47.2, 12.5; BET surface area =  $848 \text{ m}^2 \text{ g}^{-1}$ ; total pore volume =  $0.66 \text{ cm}^3 \text{ g}^{-1}$  at ( $P/P_o = 0.98$ ); Temperature at the maximum point of the weight loss ascribed to the generalized decomposition ( $T_d$ ) is  $545 \text{ }^\circ\text{C}$ .

***PIM-DTFM-BTrip (PIMf)***: This polymer was obtained as a yellow powder in an 84 % yield (based on the molecular weight of the repeated unit);  $v_{\text{max}} \text{ (cm}^{-1}\text{)}$ : 2980, 1439, 1298, 1271, 1206, 1188, 1161, 1128, 1088, 1007, 905, 885, 671;  $^{13}\text{C NMR}$  (76 MHz, solid state):  $\delta$  (ppm) 144.9, 137.6, 131.2, 127.6, 119.3, 114.3, 109.2, 94.7, 47.4, 11.7; BET surface area =  $964 \text{ m}^2 \text{ g}^{-1}$ ; total pore volume =  $1.02 \text{ cm}^3 \text{ g}^{-1}$  at ( $P/P_o = 0.98$ ); Temperature at the maximum point of the weight loss ascribed to the generalized decomposition ( $T_d$ ) is  $555 \text{ }^\circ\text{C}$ .

## S2. Pure gas permeation measurements

All the gases used for pure gas permeation tests were supplied by Sapio at a minimum purity of 99.9995%. Permeation tests were carried out at 1 bar of feed gas pressure and at a constant temperature of  $25 \pm 1$  °C on a fixed volume/pressure increase instrument, constructed and customized by Elektro & Elektronik Service Reuter (Geesthacht, Germany). Between two consecutive measurements, the membrane is evacuated for at least ten times the time lag of the previously measured gas, in order to guarantee a complete degassing. Before the first measurement the membrane is degassed for approximately 1 hour, or more if needed, to guarantee complete removal of absorbed species. The degassing of the membranes is performed under high vacuum conditions by a turbomolecular pump. The permeability coefficient, P, is expressed in Barrer ( $1 \text{ Barrer} = 10^{-10} \times \text{cm}^3 \text{ (STP)} \times \text{cm} \times \text{cm}^{-2} \times \text{s}^{-1} \times \text{cm Hg}^{-1}$ ) and calculated from the steady state of the permeation curve. Diffusion is calculated by the so-called time-lag method and the approximate gas solubility coefficient by assuming the validity of the diffusion-solution model. A more detailed description of the method and calculation procedures is reported elsewhere.<sup>23</sup>

## S3. References

16. H. Toyama, M. Nakamura, M. Nakamura, Y. Matsumoto, M. Nakagomi and Y. Hashimoto, *Bioorganic & Medicinal Chemistry*, 2014, **22**, 1948-1959.
17. J. Baran and H. Mayr, *The Journal of Organic Chemistry*, 1988, **53**, 4626-4628.
18. R. Luo, J. Liao, L. Xie, W. Tang and A. S. C. Chan, *Chemical Communications*, 2013, **49**, 9959-9961.
19. F. Bailly, F. Cottet and M. Schlosser, *Synthesis*, 2005, **2005**, 791-797.
20. S. A. Sydlik, Z. Chen and T. M. Swager, *Macromolecules*, 2011, **44**, 976-980.
21. B. S. Ghanem, M. Hashem, K. D. M. Harris, K. J. Msayib, M. Xu, P. M. Budd, N. Chaukura, D. Book, S. Tedds, A. Walton and N. B. McKeown, *Macromolecules*, 2010, **43**, 5287-5294.
22. P. M. Budd, B. S. Ghanem, S. Makhseed, N. B. McKeown, K. J. Msayib and C. E. Tattershall, *Chem. Commun.*, 2004, 230-231.
23. S.C. Fraga, M. Monteleone, M. Lanč, E. Esposito, A. Fuoco, L. Giorno, et al. *J. Memb. Sci.*, 2018, **561**, 39-58.

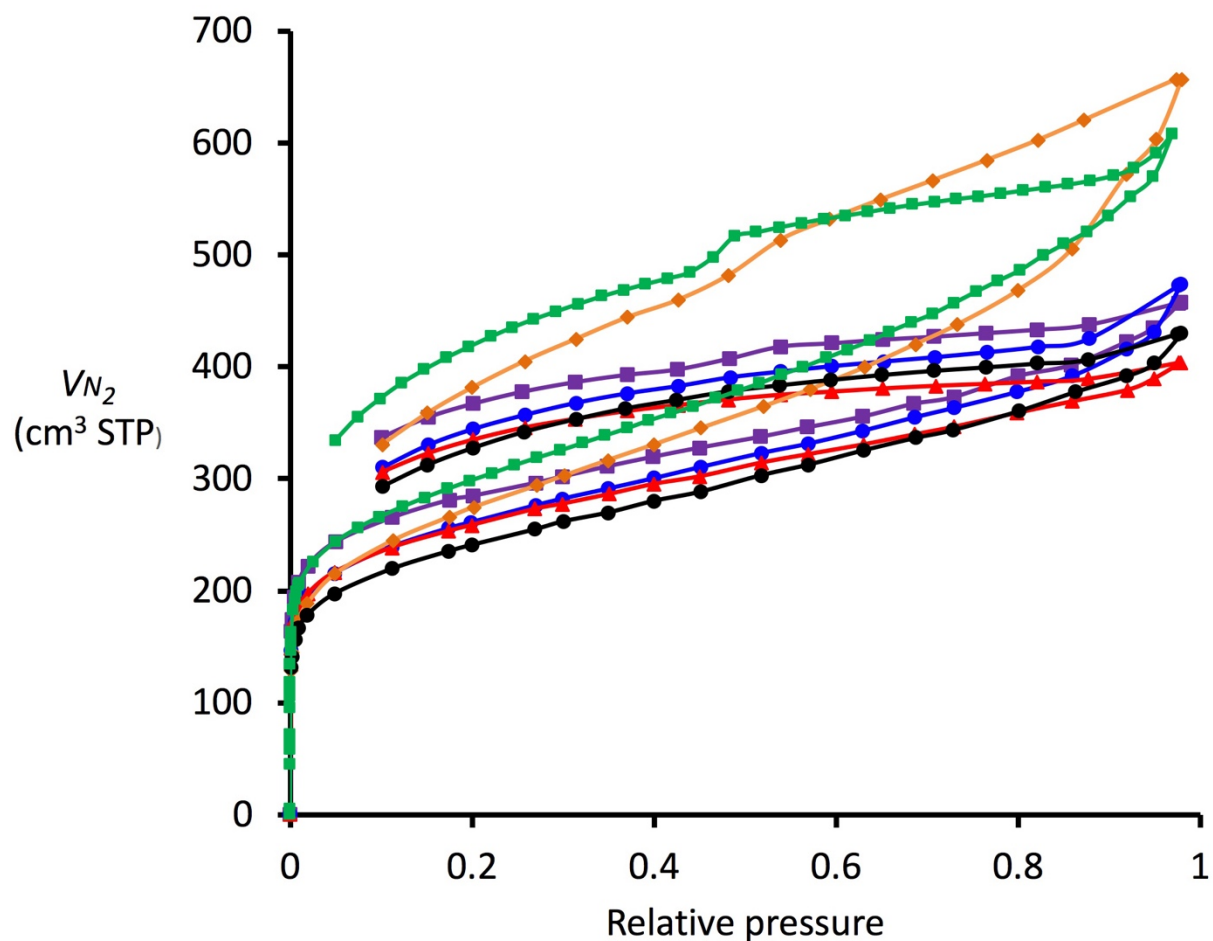

**Fig. S1.** Nitrogen adsorption isotherms acquired at 77 K for powdered samples of PIM-BTrip (▲), PIM-TMN-Trip (■), PIM-HMI-Trip (■), PIM-DM-BTrip (●), PIM-TFM-BTrip (●) and PIM- DTFM-BTrip (◆).

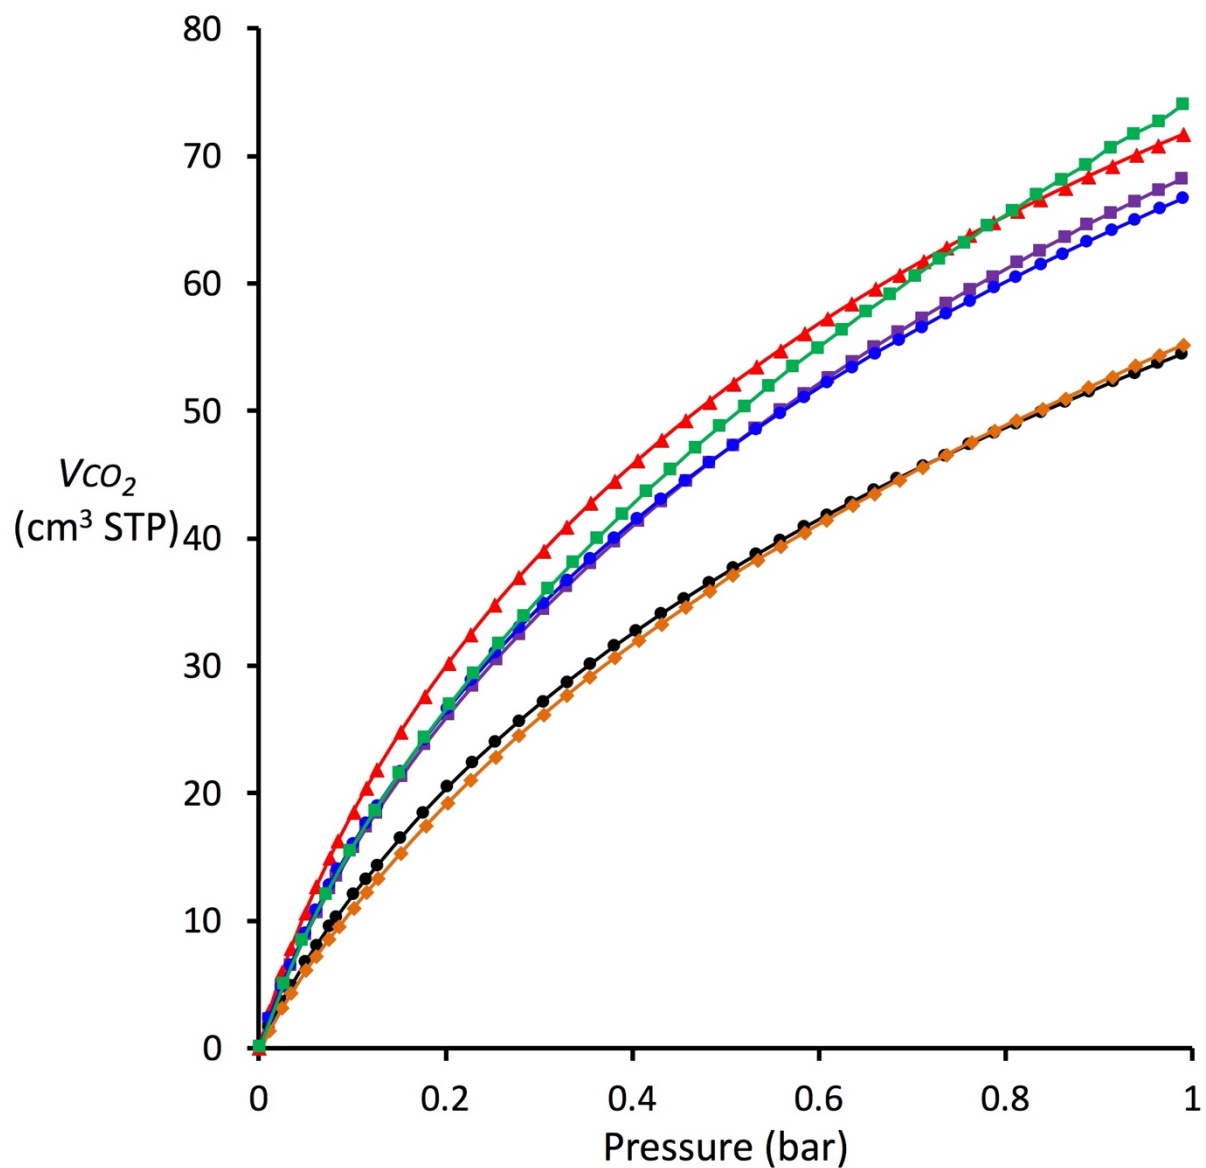

**Fig. S2.** Carbon dioxide adsorption isotherms acquired at 273 K for powdered samples of PIM-BTrip (▲), PIM-TMN-Trip (■), PIM-HMI-Trip (■), PIM-DM-BTrip (●), PIM-TFM-BTrip (●) and PIM-DTFM-BTrip (◆).

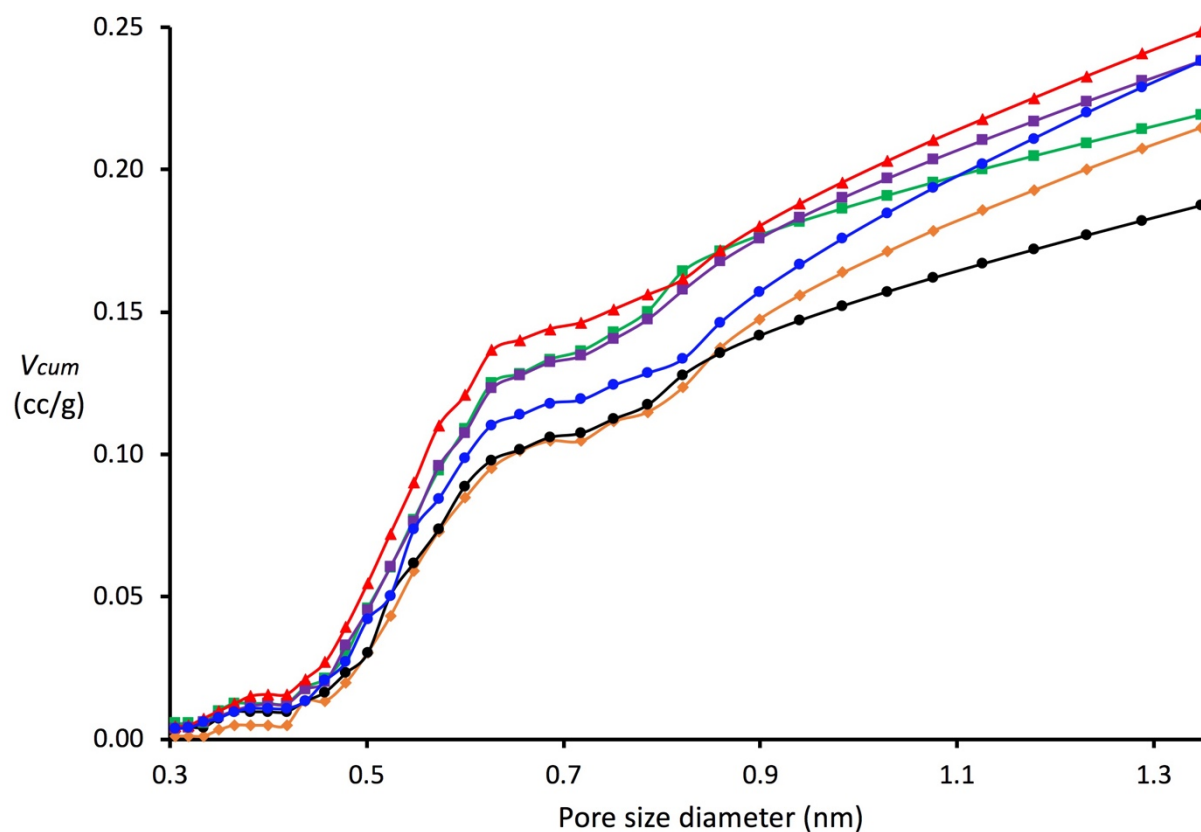

**Fig. S3.** Cumulative pore volume calculated from CO<sub>2</sub> adsorption data for PIM-BTrip (▲), PIM-TMN-Trip (■), PIM-HMI-Trip (■), PIM-DM-BTrip (●), PIM-TFM-BTrip (●) and PIM-DTFM-BTrip (◆).

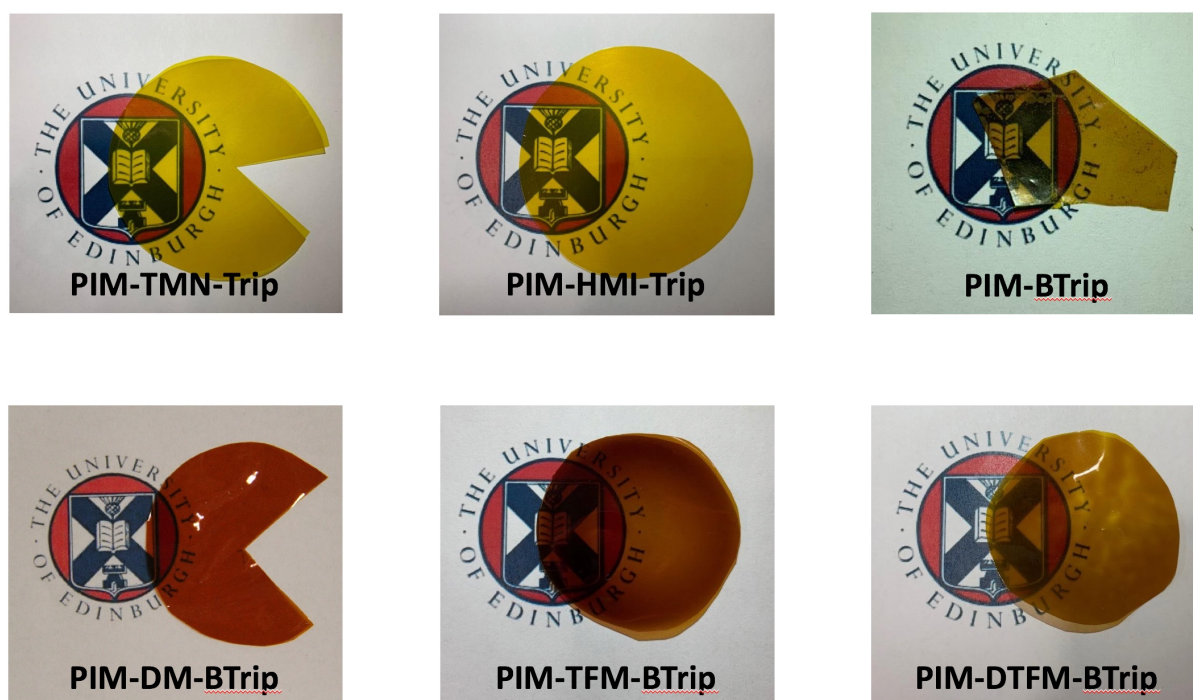

**Fig. S4.** Photographs of solvent cast films.

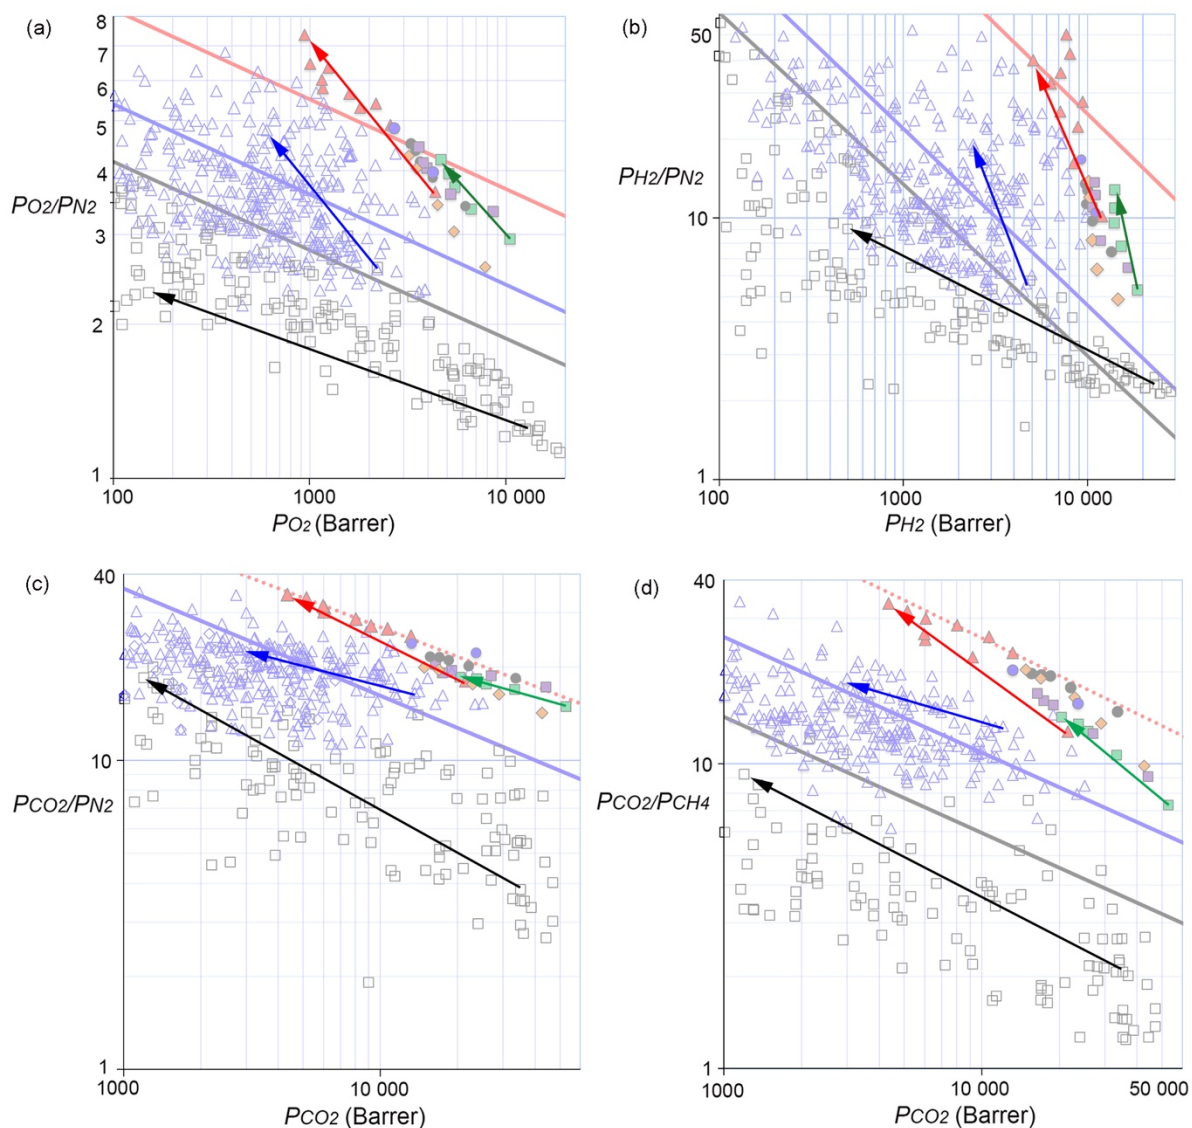

**Fig. S5.** The Robeson plots from Fig. 2 redrawn to show the ageing trends for some key highly permeable polymers: PTMSP over four years (black arrow)<sup>24</sup>; PIM-1 over 3 years (blue arrow)<sup>25</sup>; PIM-TMN-Trip over 1 year (green arrow) and PIM-BTrip over 1 year (red arrow).

24. Y. P. Yampolskii, S. M. Shishatskii, V. P. Shantorovich, E. M. Antipov, N. N. Kuzmin, S. V. Rykov, V. L. Khodjaeva and N. A. Plate, *J. Appl. Polym. Sci.*, 1993, **48**, 1935-1944.

25. C. G. Bezzu, M. Carta, M. C. Ferrari, J. C. Jansen, M. Monteleone, E. Esposito, A. Fuoco, K. Hart, T. P. Liyana-Arachchi, C. M. Colina and N. B. McKeown, *J Mater Chem A*, 2018, **6**, 10507-10514.

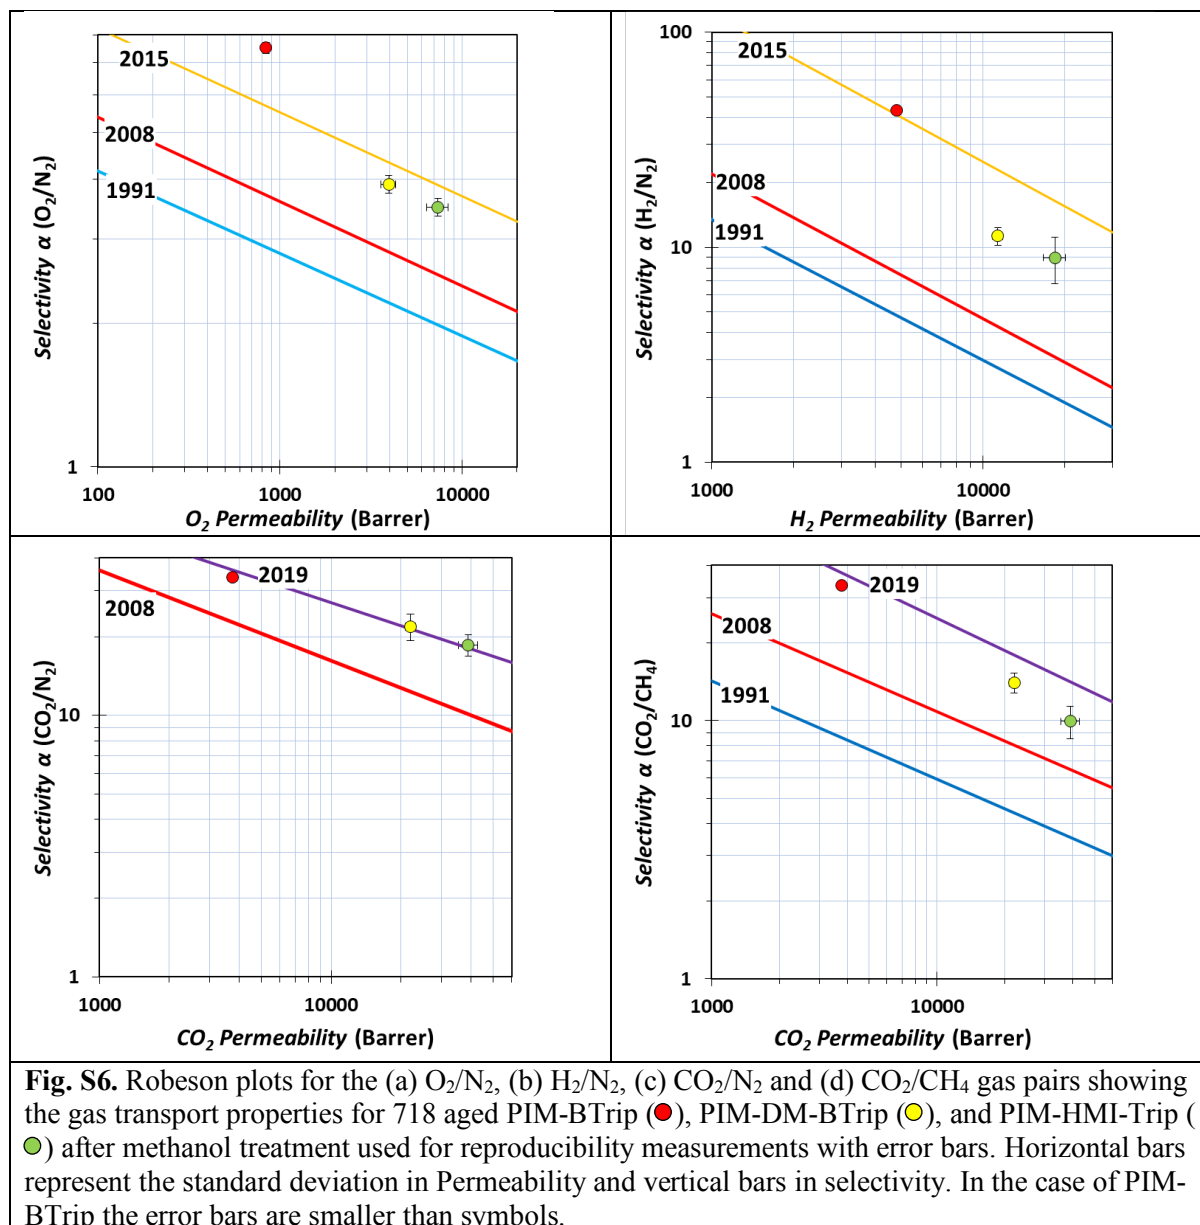

**Fig. S6.** Robeson plots for the (a)  $O_2/N_2$ , (b)  $H_2/N_2$ , (c)  $CO_2/N_2$  and (d)  $CO_2/CH_4$  gas pairs showing the gas transport properties for 718 aged PIM-BTrip (●), PIM-DM-BTrip (●), and PIM-HMI-Trip (●) after methanol treatment used for reproducibility measurements with error bars. Horizontal bars represent the standard deviation in Permeability and vertical bars in selectivity. In the case of PIM-BTrip the error bars are smaller than symbols.



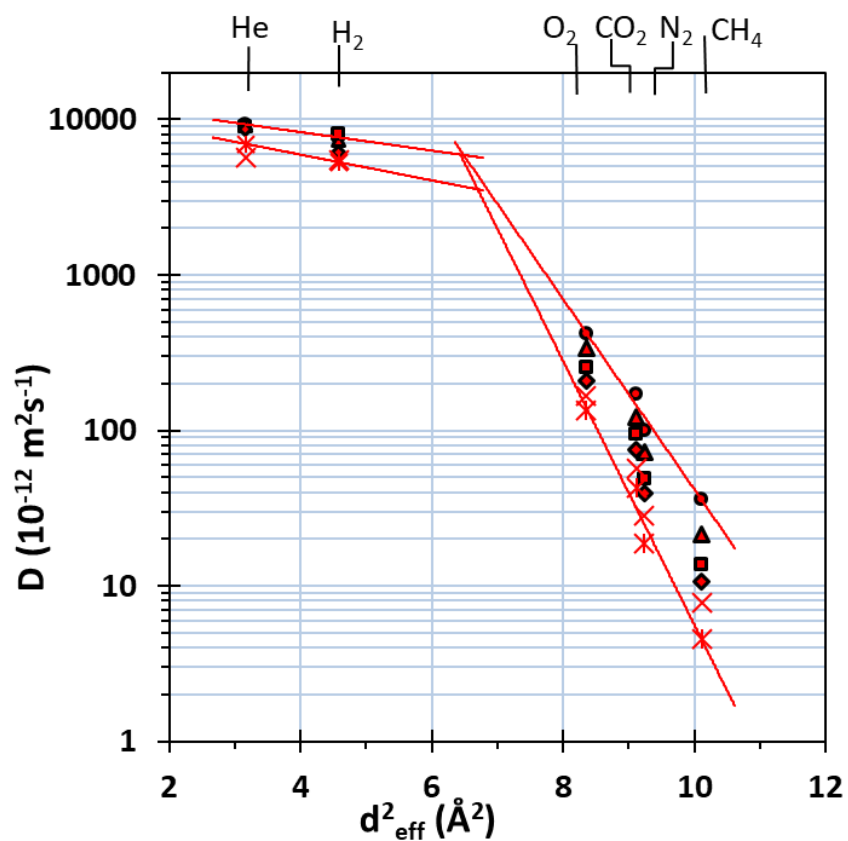

**Fig. S7.** Correlation of the diffusion coefficient with the square of the effective gas diameter for PIM-BTrip after methanol treatment (●), and after ageing for 130 (▲), 253 (■), 365 (◆), 490 (X), and 633 (⋈) days.

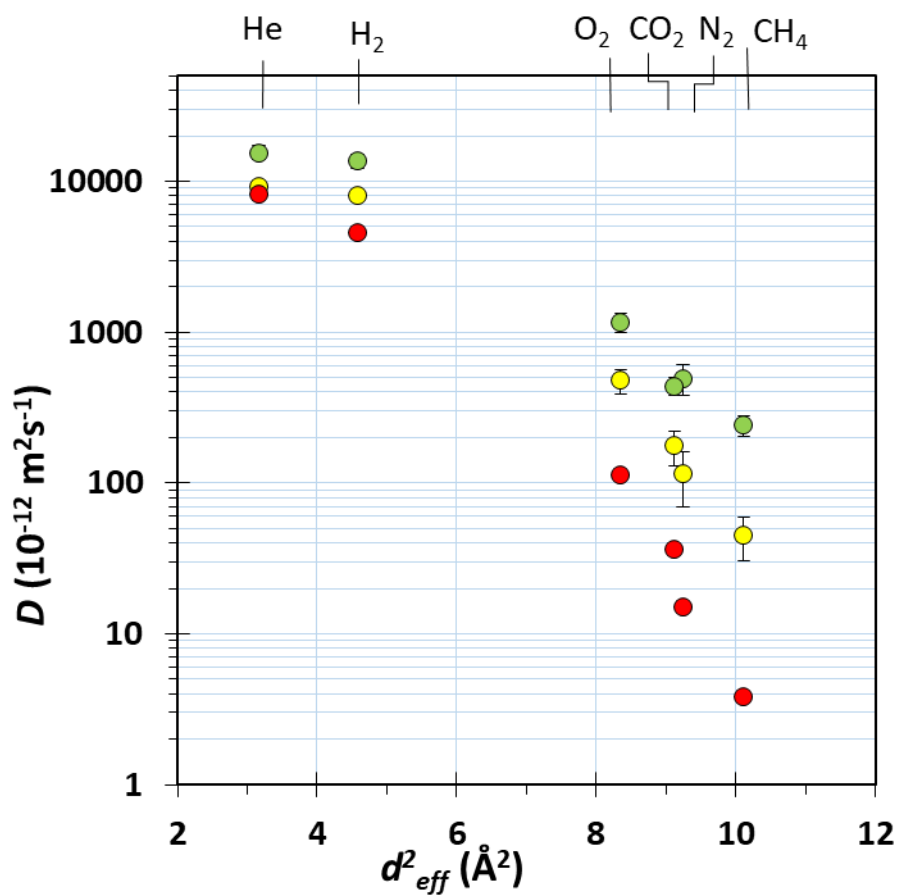

**Fig. S8.** Correlation of the diffusion coefficient with the square of the effective gas diameter for 718 aged PIM-BTrip (●), PIM-DM-BTrip (●), and PIM-HMI-Trip (●) after methanol treatment. Error bars represent the standard deviation, which is smaller than symbols for some case.

**Table S2.** Ideal gas diffusion coefficients ( $10^{-12} \text{ m}^2\text{s}^{-1}$ ) of freshly methanol treated and aged films measured at 25 °C and 1 bar of feed pressure

| PIM <sup>a</sup>      | l ( $\mu\text{m}$ ) <sup>b</sup> | D <sub>N2</sub> | D <sub>O2</sub> | D <sub>CO2</sub> | D <sub>CH4</sub> | D <sub>H2</sub> | D <sub>He</sub> | D <sub>O2</sub> /D <sub>N2</sub> | D <sub>H2</sub> /D <sub>N2</sub> | D <sub>CO2</sub> /D <sub>N2</sub> | D <sub>CO2</sub> /D <sub>CH4</sub> |
|-----------------------|----------------------------------|-----------------|-----------------|------------------|------------------|-----------------|-----------------|----------------------------------|----------------------------------|-----------------------------------|------------------------------------|
| BTrip                 | 160                              | 100             | 422             | 172              | 36.1             | 7660            | 9300            | 4.22                             | 76.6                             | 1.72                              | 4.76                               |
| (130)                 | "                                | 72.0            | 339             | 122              | 21.2             | 7310            | 9110            | 4.71                             | 101                              | 1.69                              | 5.75                               |
| (253)                 | "                                | 48.6            | 255             | 94.1             | 13.6             | 8040            | 8930            | 5.25                             | 165                              | 1.94                              | 6.92                               |
| (365)                 | "                                | 39.2            | 209             | 74.8             | 10.7             | 6180            | 8630            | 5.34                             | 158                              | 1.91                              | 6.99                               |
| (490)                 | "                                | 28.3            | 167             | 56.4             | 7.76             | 5520            | 8400            | 5.90                             | 195                              | 1.99                              | 7.27                               |
| (633)                 | "                                | 18.7            | 135             | 43.0             | 4.5              | 5320            | 8230            | 7.25                             | 285                              | 2.30                              | 9.55                               |
| (718) <sup>c</sup>    | "                                | 15.2            | 113             | 36.0             | 3.79             | 4600            | 8170            | 7.44                             | 304                              | 2.38                              | 9.51                               |
|                       |                                  | ( $\pm 1.2$ )   | ( $\pm 6$ )     | ( $\pm 1.9$ )    | ( $\pm 0.29$ )   | ( $\pm 243$ )   | ( $\pm 295$ )   | ( $\pm 0.17$ )                   | ( $\pm 9.58$ )                   | ( $\pm 0.07$ )                    | ( $\pm 0.22$ )                     |
| BTrip                 | 64                               | 48.6            | 274             | 88.3             | 11.9             | 5230            | 5440            | 5.64                             | 108                              | 1.82                              | 7.42                               |
| (120)                 | "                                | 30.2            | 183             | 61.6             | 9.3              | 4160            | 4980            | 6.07                             | 138                              | 2.04                              | 6.62                               |
| (253)                 | "                                | 36.6            | 218             | 70.9             | 10.5             | 6870            | 4980            | 5.95                             | 187                              | 1.94                              | 6.75                               |
| (371)                 | "                                | 18.9            | 122             | 34.7             | 4.7              | 6311            | 3788            | 6.44                             | 334                              | 1.84                              | 7.38                               |
| TMN-Trip              | 166                              | 803             | 1700            | 641              | 413              | 15900           | 20600           | 2.12                             | 19.8                             | 0.80                              | 1.55                               |
| (120)                 | "                                | 303             | 1020            | 418              | 113              | 18800           | 12800           | 3.37                             | 62.0                             | 1.38                              | 3.70                               |
| (253)                 | "                                | 234             | 854             | 346              | 89.6             | 12500           | 14900           | 3.65                             | 53.55                            | 1.48                              | 3.86                               |
| (358)                 | "                                | 195             | 762             | 302              | 73.0             | 12100           | 14400           | 3.92                             | 62.1                             | 1.55                              | 4.13                               |
| (426)                 | "                                | 160             | 667             | 271              | 58.8             | 11600           | 15900           | 4.17                             | 72.6                             | 1.69                              | 4.61                               |
| HMI-Trip <sup>d</sup> | 135                              | 494             | 1160            | 439              | 241              | 13700           | 15500           | 2.39                             | 29.3                             | 0.90                              | 1.83                               |
|                       |                                  | ( $\pm 110$ )   | ( $\pm 172$ )   | ( $\pm 62$ )     | ( $\pm 36$ )     | ( $\pm 1490$ )  | ( $\pm 1680$ )  | ( $\pm 0.29$ )                   | ( $\pm 9.6$ )                    | ( $\pm 0.09$ )                    | ( $\pm 0.11$ )                     |
| (120)                 | "                                | 320             | 964             | 383              | 127              | 11500           | 14300           | 3.01                             | 35.9                             | 1.20                              | 3.02                               |
| (253)                 | "                                | 184             | 690             | 266              | 63.9             | 10200           | 12000           | 3.75                             | 55.6                             | 1.45                              | 5.72                               |
| (358)                 | "                                | 144             | 593             | 241              | 51.0             | 10100           | 11400           | 4.13                             | 70.5                             | 1.68                              | 4.73                               |
| (426)                 | "                                | 134             | 584             | 218              | 43.5             | 10000           | 11800           | 4.35                             | 74.8                             | 1.63                              | 5.01                               |
| TFM-BTrip             | 176                              | 542             | 1130            | 464              | 264              | 13800           | 16700           | 2.08                             | 25.5                             | 0.86                              | 1.76                               |
| (123)                 | "                                | 189             | 710             | 277              | 61.4             | 11300           | 13200           | 3.76                             | 59.8                             | 1.47                              | 4.51                               |
| (255)                 | "                                | 145             | 579             | 216              | 44.3             | 8290            | 12800           | 3.99                             | 57.7                             | 1.49                              | 4.87                               |
| (367)                 | "                                | 124             | 531             | 197              | 39.0             | 9530            | 13300           | 4.28                             | 107                              | 1.59                              | 5.05                               |
| (496)                 | "                                | 103             | 474             | 186              | 32.6             | 9455            | 13500           | 4.60                             | 91.7                             | 1.80                              | 5.70                               |
| DTFM-BTrip            | 112                              | 375             | 1110            | 430              | 165              | 10300           | 11100           | 2.96                             | 27.5                             | 1.15                              | 2.61                               |
| (119)                 | "                                | 317             | 859             | 347              | 108              | 9080            | 12300           | 2.71                             | 28.6                             | 1.09                              | 3.21                               |
| (366)                 | "                                | 196             | 672             | 273              | 60.7             | 8920            | 11600           | 3.42                             | 45.4                             | 1.39                              | 4.50                               |
| (490)                 | "                                | 131             | 518             | 195              | 37.8             | 9030            | 9380            | 3.95                             | 68.9                             | 1.49                              | 5.16                               |
| (636)                 | "                                | 111             | 473             | 170              | 31.1             | 8910            | 9960            | 4.25                             | 80.0                             | 1.52                              | 5.46                               |
| DM-BTrip <sup>d</sup> | 114                              | 115             | 478             | 176              | 44.8             | 8140            | 9300            | 4.41                             | 77.1                             | 1.59                              | 4.00                               |
|                       |                                  | ( $\pm 46$ )    | ( $\pm 87$ )    | ( $\pm 46$ )     | ( $\pm 14.2$ )   | ( $\pm 592$ )   | ( $\pm 701$ )   | ( $\pm 0.91$ )                   | ( $\pm 21.7$ )                   | ( $\pm 0.21$ )                    | ( $\pm 0.51$ )                     |
| (128)                 | "                                | 61.9            | 313             | 113              | 19.2             | 7700            | 10000           | 5.06                             | 124                              | 1.83                              | 5.88                               |

<sup>a</sup> The number in parentheses is the ageing time in days. <sup>b</sup> The thickness did not exhibit significant changes upon ageing. <sup>c</sup> Average and standard deviation (between parentheses) of four independent measurements of the same aged sample. <sup>d</sup> Average and standard deviation (between parentheses) of four independent samples.

**Table S3.** Ideal gas solubility coefficients ( $\text{cm}^3_{\text{STP}} \text{cm}^{-3} \text{bar}^{-1}$ ) of freshly methanol treated and aged films at 25 °C and 1 bar of feed pressure

| PIM <sup>a</sup>      | l ( $\mu\text{m}$ ) <sup>b</sup> | S <sub>N2</sub> | S <sub>O2</sub> | S <sub>CO2</sub> | S <sub>CH4</sub> | S <sub>H2</sub> | S <sub>He</sub> | S <sub>O2/S<sub>N</sub></sub> <sup>2</sup> | S <sub>H2/S<sub>N2</sub></sub> | S <sub>CO2/S<sub>N2</sub></sub> | S <sub>CO2/S<sub>CH4</sub></sub> |
|-----------------------|----------------------------------|-----------------|-----------------|------------------|------------------|-----------------|-----------------|--------------------------------------------|--------------------------------|---------------------------------|----------------------------------|
| BTrip                 | 160                              | 8.85            | 7.69            | 94.1             | 35.2             | 1.18            | 0.37            | 0.87                                       | 0.13                           | 10.6                            | 2.67                             |
| (130)                 | "                                | 5.44            | 5.68            | 80.8             | 20.1             | 0.87            | 0.26            | 1.04                                       | 0.16                           | 14.8                            | 4.02                             |
| (253)                 | "                                | 6.19            | 6.39            | 85.1             | 22.6             | 0.83            | 0.29            | 1.03                                       | 0.13                           | 13.7                            | 3.77                             |
| (365)                 | "                                | 5.35            | 5.66            | 80.4             | 19.8             | 0.87            | 0.24            | 1.06                                       | 0.16                           | 15.0                            | 4.06                             |
| (490)                 | "                                | 5.17            | 5.57            | 80.6             | 19.5             | 0.87            | 0.24            | 1.08                                       | 0.17                           | 15.6                            | 4.13                             |
| (633)                 | "                                | 5.12            | 5.18            | 76.0             | 21.6             | 0.72            | 0.20            | 1.01                                       | 0.14                           | 14.8                            | 3.52                             |
| (718) <sup>c</sup>    | "                                | 5.53            | 5.58            | 78.4             | 22.3             | 0.79            | 0.20            | 1.01                                       | 0.14                           | 14.2                            | 3.52                             |
|                       |                                  | ( $\pm 0.23$ )  | ( $\pm 0.03$ )  | ( $\pm 0.71$ )   | ( $\pm 0.90$ )   | ( $\pm 0.02$ )  | ( $\pm 0.01$ )  | ( $\pm 0.04$ )                             | ( $\pm 0.01$ )                 | ( $\pm 0.5$ )                   | ( $\pm 0.12$ )                   |
| BTrip                 | 64                               | 5.23            | 4.92            | 78.2             | 26.1             | 1.35            | 0.55            | 0.94                                       | 0.26                           | 14.9                            | 3.00                             |
| (120)                 | "                                | 4.98            | 4.75            | 73.6             | 19.1             | 1.29            | 0.46            | 0.95                                       | 0.26                           | 14.7                            | 3.84                             |
| (253)                 | "                                | 3.90            | 3.94            | 63.4             | 16.0             | 0.88            | 0.53            | 1.01                                       | 0.23                           | 16.3                            | 3.96                             |
| (371)                 | "                                | 6.10            | 6.14            | 111              | 25.8             | 0.92            | 0.72            | 1.01                                       | 0.15                           | 18.3                            | 4.30                             |
| TMN-Trip              | 166                              | 3.31            | 4.60            | 61.8             | 13.2             | 0.89            | 0.24            | 1.39                                       | 0.27                           | 18.7                            | 4.68                             |
| (120)                 | "                                | 4.87            | 4.85            | 59.9             | 20.8             | 0.61            | 0.33            | 1.00                                       | 0.13                           | 12.3                            | 2.88                             |
| (253)                 | "                                | 4.71            | 4.78            | 56.0             | 17.0             | 0.84            | 0.26            | 1.02                                       | 0.18                           | 11.9                            | 3.31                             |
| (358)                 | "                                | 4.97            | 5.00            | 58.7             | 18.0             | 0.88            | 0.28            | 1.01                                       | 0.18                           | 11.8                            | 3.27                             |
| (426)                 | "                                | 5.17            | 5.20            | 56.6             | 18.3             | 0.91            | 0.25            | 1.00                                       | 0.18                           | 10.9                            | 3.09                             |
| HMI-Trip <sup>d</sup> | 135                              | 3.28            | 4.77            | 67.1             | 12.5             | 1.01            | 0.32            | 1.48                                       | 0.31                           | 20.6                            | 5.41                             |
|                       |                                  | ( $\pm 0.47$ )  | ( $\pm 0.22$ )  | ( $\pm 6.1$ )    | ( $\pm 1.6$ )    | ( $\pm 0.04$ )  | ( $\pm 0.03$ )  | ( $\pm 0.23$ )                             | ( $\pm 0.05$ )                 | ( $\pm 1.85$ )                  | ( $\pm 0.49$ )                   |
| (120)                 | "                                | 3.37            | 4.03            | 52.8             | 12.7             | 0.77            | 0.22            | 1.20                                       | 0.23                           | 15.7                            | 4.16                             |
| (253)                 | "                                | 3.97            | 4.28            | 53.4             | 14.3             | 0.78            | 0.25            | 1.08                                       | 0.20                           | 13.5                            | 3.73                             |
| (358)                 | "                                | 4.74            | 4.75            | 54.1             | 15.9             | 0.83            | 0.28            | 1.00                                       | 0.17                           | 11.4                            | 3.40                             |
| (426)                 | "                                | 4.50            | 4.59            | 56.5             | 16.7             | 0.82            | 0.26            | 1.02                                       | 0.18                           | 12.6                            | 3.38                             |
| TFM-BTrip             | 176                              | 2.53            | 4.11            | 54.4             | 6.47             | 0.74            | 0.23            | 1.62                                       | 0.29                           | 21.5                            | 8.41                             |
| (123)                 | "                                | 4.33            | 4.47            | 59.9             | 15.2             | 0.71            | 0.23            | 1.03                                       | 0.16                           | 13.8                            | 3.94                             |
| (255)                 | "                                | 4.53            | 4.71            | 64.0             | 16.1             | 0.89            | 0.24            | 1.04                                       | 0.20                           | 14.1                            | 3.96                             |
| (367)                 | "                                | 4.79            | 4.87            | 64.7             | 16.8             | 0.80            | 0.23            | 1.02                                       | 0.17                           | 13.5                            | 3.85                             |
| (496)                 | "                                | 5.26            | 5.16            | 63.1             | 18.2             | 0.77            | 0.22            | 0.98                                       | 0.15                           | 12.0                            | 3.47                             |
| DTFM-BTrip            | 112                              | 6.00            | 5.26            | 74.3             | 19.7             | 1.07            | 0.40            | 0.88                                       | 0.18                           | 12.4                            | 3.77                             |
| (119)                 | "                                | 4.26            | 4.72            | 62.8             | 15.0             | 0.94            | 0.28            | 1.11                                       | 0.22                           | 14.7                            | 4.19                             |
| (366)                 | "                                | 4.99            | 4.97            | 62.7             | 17.2             | 0.90            | 0.30            | 1.00                                       | 0.18                           | 12.6                            | 3.65                             |
| (490)                 | "                                | 4.96            | 5.06            | 65.1             | 17.7             | 0.87            | 0.38            | 1.02                                       | 0.17                           | 13.1                            | 3.67                             |
| (636)                 | "                                | 4.99            | 5.03            | 65.42            | 17.55            | 0.86            | 0.36            | 1.01                                       | 0.17                           | 13.1                            | 3.69                             |
| DM-BTrip <sup>d</sup> | 114                              | 7.23            | 6.31            | 97.0             | 28.1             | 1.05            | 0.32            | 0.91                                       | 0.15                           | 13.9                            | 3.57                             |
|                       |                                  | ( $\pm 2.04$ )  | ( $\pm 1.03$ )  | ( $\pm 17.7$ )   | ( $\pm 7.8$ )    | ( $\pm 0.10$ )  | ( $\pm 0.03$ )  | ( $\pm 0.20$ )                             | ( $\pm 0.04$ )                 | ( $\pm 2.7$ )                   | ( $\pm 0.67$ )                   |
| (128)                 | "                                | 6.31            | 6.33            | 81.0             | 23.4             | 0.96            | 0.26            | 1.00                                       | 0.15                           | 12.8                            | 3.46                             |

<sup>a</sup> The number in parentheses is the ageing time in days. <sup>b</sup> The thickness did not exhibit significant changes upon ageing. <sup>c</sup> Average and standard deviation (between parentheses) of four independent measurements of the same aged sample. <sup>d</sup> Average and standard deviation (between parentheses) of four independent samples.
